# Supplementary material for: Recovery from sleep disturbance precedes that of depression and anxiety following mild traumatic brain injury: a 6-week follow-up study
Source: PubMed Central journal article supplement — BMJ Open. 2014 Jan 22;4(1):e004205. doi: 10.1136/bmjopen-2013-004205 (PMC3902386; doi:10.1136/bmjopen-2013-004205), 2014-01-22
Supplement: bmjopen-2013-004205.draft_revisions.pdf [file bmjopen-2013-004205.draft_revisions.pdf]

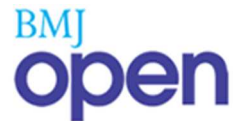

**Recovery from Sleep Disturbance Precedes that of Depression and Anxiety Following Mild Traumatic Brain Injury: A Six-Week Follow-up Study**

|                                 |                                                                                                                                                                                                                                                                                                                                                                                                                                                                                                                                 |
|---------------------------------|---------------------------------------------------------------------------------------------------------------------------------------------------------------------------------------------------------------------------------------------------------------------------------------------------------------------------------------------------------------------------------------------------------------------------------------------------------------------------------------------------------------------------------|
| Journal:                        | <i>BMJ Open</i>                                                                                                                                                                                                                                                                                                                                                                                                                                                                                                                 |
| Manuscript ID:                  | bmjopen-2013-004205                                                                                                                                                                                                                                                                                                                                                                                                                                                                                                             |
| Article Type:                   | Research                                                                                                                                                                                                                                                                                                                                                                                                                                                                                                                        |
| Date Submitted by the Author:   | 09-Oct-2013                                                                                                                                                                                                                                                                                                                                                                                                                                                                                                                     |
| Complete List of Authors:       | Ma, Hon-Ping; Shuang Ho Hospital, Taipei Medical University, Emergency medicine<br>Ou, Ju-Chi; Shuang Ho Hospital, Taipei medical university, Emergency<br>Yeh, Chun-Ting; Shuang Ho Hospital, Taipei Medical University, Emergency medicine<br>Wu, Dean; Shuang Ho Hospital, Neurology and Sleep Center<br>Tsai, Shin-Han; Shuang Ho Hospital, Taipei medical university, Emergency<br>Chiu, Wen-Ta; Ministry of Health and Welfare,<br>Hu, Chaur-Jong; Shuang Ho Hospital, Taipei Medical University, Department of Neurology |
| <b>Primary Subject Heading</b>: | Neurology                                                                                                                                                                                                                                                                                                                                                                                                                                                                                                                       |
| Secondary Subject Heading:      | Mental health                                                                                                                                                                                                                                                                                                                                                                                                                                                                                                                   |
| Keywords:                       | Depression & mood disorders < PSYCHIATRY, Anxiety disorders < PSYCHIATRY, CLINICAL PHYSIOLOGY                                                                                                                                                                                                                                                                                                                                                                                                                                   |
|                                 |                                                                                                                                                                                                                                                                                                                                                                                                                                                                                                                                 |

SCHOLARONE™  
Manuscripts

1  
2  
3 **Recovery from Sleep Disturbance Precedes that of Depression and Anxiety**  
4 **Following Mild Traumatic Brain Injury: A Six-Week Follow-up Study**  
5  
6

7 Hon-Ping Ma<sup>1,2</sup>; Ju-Chi Ou<sup>1</sup>; Chun-Ting Yeh<sup>1,2</sup>; Dean Wu<sup>3</sup>; Shin-Han Tsai<sup>1,2,4</sup>; Wen-Ta  
8 Chiu<sup>5</sup>; Chaur-Jong Hu<sup>3,6,7</sup>  
9  
10

11 <sup>1</sup> Department of Emergency medicine, Shuang Ho Hospital, Taipei Medical University, New  
12 Taipei City, Taiwan

13 <sup>2</sup> Department of Emergency medicine, School of Medicine, Taipei Medical University, Taipei,  
14 Taiwan  
15

16 <sup>3</sup> Department of Neurology and Sleep Center, Shuang Ho Hospital, Taipei Medical University,  
17 New Taipei City, Taiwan  
18

19 <sup>4</sup> Graduate Institute of Injury Prevention and Control, College of Public Health and Nutrition,  
20 Taipei Medical University, Taipei, Taiwan  
21

22 <sup>5</sup> Ministry of Health and Welfare, Taiwan, ROC  
23

24 <sup>6</sup> Department of Neurology, School of Medicine, Taipei Medical University, Taipei, Taiwan  
25

26 <sup>7</sup> Department of Neurology, National Defense medical center, Taipei, Taiwan  
27  
28  
29

30 \*Corresponding author: Chaur-Jong Hu  
31

32 291, Zhongzheng Rd, Zhonghe District, New Taipei City, 23561, Taiwan  
33

34 Email: [chaurjongh@s.tmu.edu.tw](mailto:chaurjongh@s.tmu.edu.tw) ; phone: 886-2-2249-0088  
35  
36  
37  
38  
39  
40  
41

42 Keywords: mild traumatic brain injury, depression, sleep problem, anxiety  
43  
44

45 Word count: 2142

46 Number of reference: 27  
47  
48  
49  
50  
51  
52  
53  
54  
55  
56  
57  
58  
59  
60

## ABSTRACT

**Introduction:** Previous studies of recovery after mild traumatic brain injury (mTBI) have focused on chronic mental disorders. The detailed course of these disorders at the acute and subacute stages, especially with regard to recovery from sleep disturbances, have not been well characterized. The aim of our study was to determine the course of mental disorders, including depression, anxiety, and sleep disturbance, following mTBI.

**Methods:** We recruited 250 mTBI patients and 100 healthy participants (control group) for our observational study between January 2011 to July 2012. The mTBI and control participants were assessed at baseline and 6 weeks after mTBI using the Beck Anxiety Inventory (BAI), the Beck Depression Inventory II (BDI), the Epworth Sleepiness Scale (ESS), and the Pittsburgh Sleep Quality Index (PSQI).

**Results:** The ESS scores were not significantly different between the 2 groups at baseline or at 6 weeks after mTBI. Although the BAI, BDI, and PSQI scores of the mTBI group were significantly different than those of the control group at baseline, all had improved significantly 6 weeks later. However, only the PSQI score improved to a level that was not significantly different from that of the control group.

**Conclusions:** Daytime sleepiness is not affected by mTBI. However, mTBI causes depression and anxiety and diminishes sleep quality. Although all these conditions improve significantly within 6 weeks post-mTBI, only sleep quality improves to a pre-mTBI level. Thus, recovery from mTBI-induced sleep disturbance occurs more rapidly than that of mTBI-induced depression and anxiety.

### Article summary

- 100 mTBI patients and the 137 control participants who completed the questionnaires.
- The number of women is more than the number of men that jointed our study
- Sleep disturbance, depression, anxiety improved after 6 weeks post-injury.
- Recovery from sleep disturbance occurred more rapidly

### Strengths and limitations of this study

Previous reports of the incidence of insomnia among post-acute TBI patients have ranged from 2% to 56%. In our study, 90% of the mTBI patients and 44% of the control participants reported sleep disturbances. Our data showed that recovery from sleep disturbance occurred more rapidly among the mTBI patients than did recovery from post-injury depression and anxiety. Previous studies have demonstrated significant changes in anxiety- and depression-related symptoms between 1 week and 3 months following mTBI. We observed improvement in the depression and anxiety assessment scores in our mTBI cohort at 6 weeks post-injury. Nonetheless, the BDI and the BAI scores differed significantly between the mTBI and control groups at the 6 week post-injury assessment.

Some of our mTBI patients may have used medications before or after suffering mTBI that may have influenced their assessment scores. It is also possible that some of our mTBI patients may have had unrelated diseases or pre-injury conditions that were not identified before or during their participation in our study. In addition, we investigated only the subacute stages of depression, anxiety, and diminished sleep quality, rather than the chronic stages of these diseases.

## INTRODUCTION

Traumatic brain injury (TBI) and mild traumatic brain injury (mTBI) are major public health problems. Studies in Australia have estimated lifetime costs of over \$2.5 million per TBI survivor [1]. Headache, blurred vision, fatigue, and sleep disturbance are the most common physical symptoms following brain injury [2]. Previous studies have reported that the symptom scores following mTBI were equal to that of control patients within 7 days post-injury [3].

However, increasing evidence suggests that the risk of developing a psychiatric disorder increases following mTBI [4]. Although multiple studies have investigated post-traumatic stress disorder (PTSD), the risk of other disorders, such as depression, have also been found to increase following mTBI [5]. The most common psychiatric disorders during the first 12 months following injury are depression, anxiety disorder, and agoraphobia [4].

Diminished sleep quality is one of the most commonly reported symptoms following mTBI [6], and depression and anxiety are also prevalent. However, these conditions are often under-reported, and may become chronic in the absence of treatment. The objectives of our study were to characterize the course of post-mTBI depression, anxiety, and diminished sleep quality during a 6-week follow up, and to compare the baseline and 6-week clinical assessments of mTBI patients with those of healthy participants.

## METHODS

### Participants and Study Design

Our prospective study was approved by the Joint Institutional Review Board of Taipei Medical University. Eligible patients aged  $\geq 20$  years who were treated in an emergency room within 24 hours after closed head trauma were recruited from 3 hospitals in Taiwan between January 2011 and July 2012. The definition of mTBI was based on the diagnostic criteria established by the American Congress of Rehabilitation Medicine, which consist of a Glasgow Coma Scale (GCS) score of 13 to 15 at presentation and loss of consciousness for  $< 30$  min. Patients with a history of cerebrovascular disease, mental retardation, previous TBI, epilepsy, or severe systemic medical illness were excluded from our study. The inclusion of the healthy control participants were no brain injury history and older than 20 years old.

Patients were initially contacted by phone. A total of 607 mTBI patients were recruited for our study, among whom 250 (41.19%) provided informed consent, and completed a baseline assessment during an initial evaluation within 1 month after experiencing an mTBI. Six weeks after completing the baseline assessment, 100 (40%) of the mTBI patients completed the final assessment. The baseline and 6-week assessments consisted of 4 investigator-administered questionnaires, namely, the Beck Anxiety Inventory (BAI) [7], the Beck Depression Inventory-II (BDI) [8], the Epworth Sleepiness Scale (ESS) [9], and the Pittsburgh Sleep Quality Index (PSQI) [10].

## Outcome Measures

The patients' demographic information, injury-related data, and smoking and drinking history were recorded at the baseline evaluation. Chinese versions of the BDI, the BAI, the ESS, and the PSQI were used in our study [11-13]. Depression was assessed using the BDI, which scored the patient's selection of 1 of 4 possible responses to 21 multiple-choice items on a scale of 0 to 3 based on their response. The severity of anxiety symptoms was assessed using the BAI, which also scored the patient's selection of 1 of 4 possible responses to 21 multiple-choice items on a scale of 0 to 3 based on their response. A high score on the BAI indicates a high level of anxiety. Daytime sleepiness was subjectively assessed using the ESS, which asked the patient to rate their risk of falling asleep on a 4-point Likert scale (0-3) in 8 different situations. Overall sleep quality was assessed using the PSQI, which evaluated 7 aspects of sleep quality. A high overall score on the PSQI indicates poor sleep quality.

## Statistical methods

Associations between the categorical variables were evaluated using a chi-squared analysis, and the Fisher exact test was used when at least one of the values was  $<5$ . Associations between the normally distributed continuous variables were evaluated using  $t$  tests, and the Mann-Whitney U test was used to evaluate the continuous variables with an asymmetrical distribution. Paired  $t$  tests and a paired Mann-Whitney U test were used to evaluate the intragroup differences between the baseline and 6-week assessments for normally and asymmetrically distributed data, respectively. In addition, linear regression analyses were conducted for outcomes with or without adjustment for age and sex. All the statistical analyses were performed using the R statistical software, version 3.0.1 for Windows (R Foundation for Statistical Computing, Vienna, Austria). The level of statistical significance was set at  $P < .05$ .

## RESULTS

The demographic information and clinical data of all the mTBI and control participants who were initially enrolled in the study are shown in Table 1. Six weeks following their baseline assessment, 150 patients could not be contacted, or declined to participate further in our study. The age; sex; education level; smoking status; alcohol use; proportion reporting depression; mechanism of injury; and GCS, BDI, ESS scores of patients who completed the study did not differ significantly from those of patients who did not complete the study. The patients who did not complete the study had lower mean scores for the BAI and the PSQI than the patients who completed the study.

The demographic information and clinical data of the 100 mTBI patients and the 137 control participants who completed the study are shown in Table 2. The mean age of the mTBI group

1  
2  
3 was significantly higher than the mean age of the control group. The proportions reporting  
4 alcohol use, headache, and depression were significantly different between the mTBI and  
5 control groups. The percentages of mTBI patients who reported headache or depression were  
6 higher than those of the control group. Transportation accidents and falls caused 39% and  
7 34% of the mTBI cases, respectively. Considering the clinical cut-off for each questionnaire,  
8 most control patients did not have depression, anxiety, daytime sleepiness, or diminished  
9 sleep quality, whereas most of mTBI patients had high PSQI scores.

10  
11 The mean scores of the 4 outcome measures are shown in Figure 1. The average scores  
12 for the mTBI patients at baseline were the highest. After 6 weeks, the average scores for the  
13 mTBI patients decreased. The differences between the outcomes of the mTBI and control  
14 groups are shown in Table 3. The average baseline and 6-week BAI scores for mTBI group  
15 were 10.74 and 7.23, respectively. The BAI scores of the patients in the mTBI group  
16 significantly improved at 6 weeks post-injury. However, the mean BAI scores for the mTBI  
17 group for both the baseline and 6 week assessments were significantly different from those of  
18 the control group at the baseline assessment. The mean BDI scores of the mTBI group were  
19 9.8 and 7.99 at the baseline and 6-week assessments, respectively. The mean BDI score for  
20 mTBI group significantly decreased to 1.81 at 6 weeks post-injury. The mean BDI score of  
21 the control group was 5.72. The mean BDI scores of the mTBI group were significantly  
22 different from those of the control group.

23  
24 No significant difference was observed between the baseline and 6-week ESS scores for  
25 the mTBI group. The mean daytime sleepiness score for the control group was 6.62, which  
26 was not significantly different from that of the mTBI group. The mean baseline PSQI score  
27 for the mTBI group was greater than 9, which was higher than the clinical cut-off point of 5.  
28 In addition, the mean PSQI score of mTBI at baseline assessment was higher than the mean  
29 score of 5.7 for the control group. The mean 6-week PSQI score for the mTBI group  
30 improved significantly to 6.4. The sleep quality of the mTBI group at 6 weeks post-injury  
31 was not significantly different from that of the control group.

32  
33 Because of the significant difference in mean age between the mTBI and control groups  
34 and the predominance of women in both groups, we performed linear regression analysis of  
35 the outcome measures with and without adjusting for age and sex (Table 4). The differences  
36 in depression, anxiety, and sleep quality between the mTBI and control patients did not vary  
37 significantly before or after adjusting for age or sex. However, sex was found to be a  
38 significant predictor of sleep quality, anxiety, and depression in the baseline and 6-week  
39 assessments. After adjusting for age and sex, the ESS score was significantly different  
40 between the control and mTBI groups at the baseline and 6-week assessments, and age was  
41 determined to be a significant predictor of daytime sleepiness. In addition, the scores for all 4  
42 outcome measures were higher among women than among men.



## DISCUSSION

Previous studies have shown that 85% of mTBI patients demonstrate improvement in psychiatric-related symptoms, whereas the remainder develop chronic psychosocial problems [14-16]. Often presenting with anxiety, depression, or sleep disturbances, TBI patients are at an increased risk of developing a psychiatric disorder within 3 months to 1 year post-injury [4]. It is unclear whether post-mTBI sleep disturbances are related to depression or anxiety. Thus, sleep disturbance may be a risk factor of subsequent depression. A meta-analysis of 21 studies demonstrated that insomnia patients have a 2-fold risk of developing depression [17]. The detailed course of post-mTBI depression, anxiety, and diminished sleep quality, especially during the early stages of recovery, have not been well characterized.

We examined the early stages of recovery from mTBI by using self-reported measures of depression, anxiety, sleep quality, and daytime sleepiness. We determined that daytime sleepiness is not significantly affected by mTBI. Both the anxiety and depression symptoms in the mTBI group improved by the sixth week of recovery, but remained more severe than those of the control participants. However, sleep quality significantly improved within 6 weeks of experiencing mTBI, returning to a level that did not differ significantly from that of the control group. These results indicate that recovery from diminished sleep quality occurred more rapidly than did recovery from depression and anxiety.

Our prospective cohorts contained more women than men, and the mean ages of the mTBI and control groups differed significantly. Thus, we adjusted our analysis for effects of age and sex. The BAI, BDI, PSQI, and ESS scores were influenced by sex. However, our results demonstrated that the BAI, BDI, and PSQI scores were significantly affected by mTBI, whereas the ESS scores were not. We found the women in the mTBI group reported more severe symptoms for depression, anxiety, and diminished sleep quality at baseline. After 6 weeks of recovery, although the depression- and anxiety-related symptoms of both male and female mTBI patients improved, those of the female mTBI patients remained more severe than those of the male mTBI patients. Female mTBI patients also reported more severe symptoms related to diminished sleep quality and daytime sleepiness than did male mTBI patients.

Previous reports of the incidence of insomnia among post-acute TBI patients have ranged from 2% to 56% [18, 19]. Bryan found that sleep disturbance increases in patients who suffer repetitive TBI [20]. In our study, 90% of the mTBI patients and 44% of the control participants reported sleep disturbances. Our data showed that recovery from sleep disturbance occurred more rapidly among the mTBI patients than did recovery from post-injury depression and anxiety. There are 2 possible reasons for this finding. Sleep disturbance may be an independent symptom of mTBI that alters the circadian rhythm through injury-related changes in gene expression [21]. Alternatively, sleep disturbance may simply be a symptom of depression or anxiety that improves early during recovery [22].



1  
2  
3 Previous studies have demonstrated significant changes in anxiety- and  
4 depression-related symptoms between 1 week and 3 months following mTBI [23]. We  
5 observed improvement in the depression and anxiety assessment scores in our mTBI cohort at  
6 6 weeks post-injury. Nonetheless, the BDI and the BAI scores differed significantly between  
7 the mTBI and control groups at the 6 week post-injury assessment.  
8

9  
10 Depression and PTSD have been shown to be critical mediators of the recovery of  
11 physical health following mTBI [24]. Multiple studies have investigated the incidence of  
12 PTSD following TBI [25]. Psychiatric comorbidities have been associated with PTSD  
13 following TBI, and depression was shown to be a predictor of the post-TBI chronicity of  
14 PTSD [26, 27]. We did not explore the role of PTSD in recovery from depression, anxiety,  
15 and diminished sleep quality, but we speculate that PTSD is associated with all of these  
16 mental disorders in mTBI patients.  
17  
18

19  
20 Certain limitations to our findings should be considered. First, some of our mTBI  
21 patients may have used medications before or after suffering mTBI that may have influenced  
22 their assessment scores. Second, it is possible that some of our mTBI patients may have had  
23 unrelated diseases or pre-injury conditions that were not identified before or during their  
24 participation in our study. Third, we investigated only the subacute stages of depression,  
25 anxiety, and diminished sleep quality, rather than the chronic stages of these diseases.  
26 Although long-term observational studies are required to confirm our findings, our results  
27 provide valuable information for understanding the development and recovery of mental  
28 disorders following mTBI.  
29  
30  
31  
32  
33  
34  
35  
36  
37  
38  
39  
40  
41  
42  
43  
44  
45  
46  
47  
48  
49  
50  
51  
52  
53  
54  
55  
56  
57  
58  
59  
60

**Table 1.** The demographic and clinical data of all mTBI patients initially enrolled in our study

|                            | Lost to follow up | Completed 6-wk follow up | <i>P</i> value |
|----------------------------|-------------------|--------------------------|----------------|
| Age (y)                    | 38.88             | 39.53                    | NS             |
| Male / Female (n)          | 56/94             | 35/65                    | NS             |
| Education (y)              | 15.04             | 15.46                    | NS             |
| Smoker (N/Y)               | 113 / 37          | 82 / 18                  | NS             |
| Drink alcohol (N/Y)        | 94/56             | 58/ 42                   | NS             |
| Headache (N/Y)             | 50/100            | 25/75                    | .02            |
| Depression (N/Y)           | 91 / 59           | 51 / 49                  | NS             |
| GCS                        | 14.80             | 14.98                    | NS             |
| <b>Mechanism of Injury</b> |                   |                          |                |
| Transportation accident    | 77                | 39                       | NS             |
| Falls                      | 40                | 34                       |                |
| Other                      | 33                | 27                       |                |
| BAI                        | 7.85              | 10.74                    | .03            |
| BDI                        | 8.19              | 9.80                     | NS             |
| ESS                        | 6.89              | 7.95                     | NS             |
| PSQI                       | 6.27              | 9.51                     | <.01           |

mTBI: mild traumatic brain injury; NS:  $P > .05$ ; GCS: Glasgow Coma Scale; BAI: Beck Anxiety Inventory; BDI: Beck Depression Inventory-II; ESS: Epworth Sleepiness Scale; PSQI: Pittsburgh Sleep Quality Index

**Table 2.** The demographic and clinical data of the mTBI patients and the control participants who completed the 6-week follow up

|                             | mTBI    | Control  | <i>P</i> value |
|-----------------------------|---------|----------|----------------|
| Sample size (n)             | 100     | 137      |                |
| Age (y)                     | 39.53   | 29.86    | <.001          |
| Male / Female (n)           | 35/65   | 47/90    | NS             |
| Education (y)               | 15.46   | 14.91    | .045           |
| Smoker (N/Y)                | 82/18   | 115/22   | NS             |
| Drink (N/Y)                 | 58/42   | 51/82    | <.01           |
| Headache (N/Y)              | 25/75   | 98/39    | <.01           |
| Depression (N/Y)            | 51 / 49 | 103/ 34  | <.01           |
| GCS                         | 14.98   | -        | -              |
| <b>Questionnaires</b>       |         |          |                |
| BAI>7 (N/Y)                 | 57 / 43 | 125 / 12 | <.01           |
| BDI>9 (N/Y)                 | 53 / 47 | 111 / 26 | <.01           |
| ESS>9 (N/Y)                 | 66 / 34 | 108 / 29 | <.01           |
| PSQI>5 (N/Y)                | 10 / 90 | 77 / 60  | <.01           |
| <b>Mechanisms of Injury</b> |         |          |                |
| Transportation accident     | 39      | -        | -              |
| Falls                       | 34      | -        | -              |
| Other                       | 27      | -        | -              |

mTBI: mild traumatic brain injury; NS:  $P > .05$ ; GCS: Glasgow Coma Scale; BAI: Beck Anxiety Inventory; BDI: Beck Depression Inventory-II; ESS: Epworth Sleepiness Scale; PSQI: Pittsburgh Sleep Quality Index

**Table 3.** Differences between control participants and mTBI patients at baseline and 6 weeks post-injury

|                                         | BAI   | BDI   | ESS  | PSQI  |
|-----------------------------------------|-------|-------|------|-------|
| mTBI Baseline vs Control                | 8.02* | 4.08* | 1.33 | 3.81* |
| mTBI 6 wk vs Control                    | 4.51* | 2.27* | 0.87 | 0.7   |
| mTBI Baseline vs mTBI 6 wk <sup>+</sup> | 3.51* | 1.81* | 0.46 | 3.11* |

mTBI: mild traumatic brain injury; BAI: Beck Anxiety Inventory; BDI: Beck Depression Inventory-II; ESS: Epworth Sleepiness Scale; PSQI: Pittsburgh Sleep Quality Index

\* $P < .05$

<sup>+</sup>paired  $t$  test

**Table 4.** Adjusted differences between control participants and mTBI patients at baseline and 6 weeks post-injury

|       | Control vs mTBI (baseline) |        |         |        | Control vs mTBI (6-wk) |        |         |        |
|-------|----------------------------|--------|---------|--------|------------------------|--------|---------|--------|
|       | BAI                        | BDI    | ESS     | PSQI   | BAI                    | BDI    | ESS     | PSQI   |
| mTBI  | 8.079*                     | 4.331* | 1.808*  | 3.609* | 4.701*                 | 2.632* | 1.309*  | 0.557  |
| Age   | 0.004                      | -0.023 | -0.049* | 0.021  | -0.009                 | -0.035 | -0.045* | 0.016  |
| Women | 2.450*                     | 3.457* | 0.973   | 0.972* | 2.324*                 | 2.945* | 1.263*  | 1.170* |

mTBI: mild traumatic brain injury; BAI: Beck Anxiety Inventory; BDI: Beck Depression Inventory-II; ESS: Epworth Sleepiness Scale; PSQI: Pittsburgh Sleep Quality Index

\* $P < .05$

**Conflict of interest**

None declared.

**Acknowledgments**

This study was supported by grants from the National Science Council, Taiwan (NSC 98-2321-B-038-005-MY3, NSC 101-2321-B-038-005, DOH 101-TD-B-111-003).

**Data sharing**

There is no additional data available.

**Contributorship statement**

The six authors are justifiably credited with authorship, according to the authorship criteria.

In detail: Hon-Ping Ma

– conception, design and interpretation of data, drafting of the manuscript, final approval given; Ju-Chi Ou—analysis and interpretation of data, drafting of the manuscript, final approval given; Chun-Ting Yeh

– acquisition of data, final approval given; Dean Wu – final approval given; Shin-Han Tsai – final approval given; Wen-Ta Chiu – Conception, design, final approval given; Chaur-Jong Hu – Conception, design, analysis and interpretation of data, drafting of the manuscript, final approval given.

## References

- 1 Access Economics Pty Limited. The Economic Cost of Spinal Cord Injury and Traumatic Brain injury in Australia. Geelong, Victoria, Australia: Victorian Neurotrauma Initiative; 2009.
- 2 U.S. Department of Veterans Affairs. VA/DoD clinical practice guideline for management of concussion/mild traumatic brain injury. Washington, DC: U.S. Department of Defense; April 2009.  
[http://www.healthquality.va.gov/mtbi/concussion\\_mtbi\\_full\\_1\\_0.pdf](http://www.healthquality.va.gov/mtbi/concussion_mtbi_full_1_0.pdf). Assessed June, 18, 2013
- 3 McCrea M, Iverson GL, McAllister TW, et al. An integrated review of recovery after mild traumatic brain injury(MTBI): implications for clinical management. Clin Neuropsychol. 2009;**23**:1368-90
- 4 Bryant RA, O'Donnell M, Creamer M, et al. The psychiatric sequelae of traumatic injury. Am J Psychiatry 2010 ;**167** :312-320
- 5 O'Donnell ML, Creamer M, Bryant RA, et al. Posttraumatic disorders following injury: an empirical and methodological review. Clin Psychol Rev 2003;**23**:587-603
- 6 Orff H, Ayalon L, Drummond S. Traumatic brain injury and sleep disturbance: a review of current research. J Head Trauma Rehabil 2009;**24**:155-65
- 7 Beck AT, Epstein N, Brown G, et al. An inventory for measuring clinical anxiety: Psychometric properties. J Consult Clin Psychol 1988; **56**:893-7
- 8 Beck AT, Steer RA, Brown GK. Manual for the Beck Depression Inventory-II. San Antonio, TX: Psychological Corporation; 1996
- 9 John MW. A new method for measuring daytime sleepiness: the Epworth Sleepiness Scale. Sleep 1991; **14**:540-5

- 1  
2  
3  
4 10 Buysse DJ, Reynolds CF, Monk TH, et al. The Pittsburgh Sleep Quality index: a new instrument for  
5  
6 psychiatric practice and research. *Psychiatry Research*. 1989;**28**:193-213  
7  
8  
9  
10 11 Zheng YP, Wei LA, Goa LG, et al. Applicability of the Chinese Beck Depression Inventory. *Compr*  
11  
12 *Psychiatry*. 1988;**29**:484-9  
13  
14  
15 12 Chen NH, Johns MW, Li HY, et al. Validatio of a Chinese version of the Epworth Sleepiness Scale. *Qual life*  
16  
17 *Res*. 2002;**11**:817-21  
18  
19  
20  
21 13 Tsai PS, Wang SY, Wang MY, et al. Psychometric evaluation of the Chinese version of the Pittsburgh Sleep  
22  
23 *Quality index in primary insomnia and control subjects*. *Qual Life Res*. 2005 **14**; 1943-52  
24  
25  
26  
27 14 Ruff R. Two decades of advances in understanding of mild traumatic brain injury. *J Head Trauma Rehabil*  
28  
29 *2005; 20*:5-18  
30  
31  
32  
33 15 Wood RL. Understanding the ‘miserable minority’: A diathesis-stress paradigm for postconcussional  
34  
35 *syndrome*. *Brain Injury* 2004;**18**:1135-1153  
36  
37  
38  
39 16 Bazarian J, McClung J, Shah M, et al. Mild traumatic brain injury in the US 1998-2000. *Brain Injury*  
40  
41 *2005;19*:85-91  
42  
43  
44 17 Baglioni C, Battagliese G, Feige B, et al. Insomnia as a predictor of depression: a meta-analytic evaluation of  
45  
46 *longitudinal epidemiological studies*. *J Affect Disord* 2011;**135**:10-19  
47  
48  
49  
50 18 Rutherford WH, Merrett JD, McDonald JR. Symptoms at one year following concussion from minor head  
51  
52 *injuries*. *Injury* 1977; **1**:1-4  
53  
54  
55  
56 19 Beetar JT, Guilmette TJ, Sparadeo FR. Sleep and pain complaints in symptomatic traumatic brain injury and  
57  
58  
59  
60



1  
2  
3  
4 neurologic populations. Archives of Physical Medicine and Rehabilitation 1996;77:1298-1302

5  
6  
7 20 Bryan CJ. Repetitive Traumatic Brain injury (or Concussion) Increases Severity of Sleep Disturbance among

8  
9  
10 Deployed Military Personnel. Sleep 2013;1;36:941-6

11  
12 21 Palagini L, Biber K, Riemann D. The genetics of insomnia – evidence for epigenetic mechanisms? Sleep

13  
14  
15 Med Rev. 2013;1-11

16  
17  
18 22 Breslau N, Roth T, Rosenthal L, Andreski P. Sleep disturbance and psychiatric disorders: a longitudinal

19  
20  
21 epidemiological study of young adults. Biol Psychiatry 1996;30:411-8

22  
23  
24 23 Ponsford J, Cameron P, Fitzgerald M, et al. Long-term outcomes after uncomplicated mild traumatic brain

25  
26  
27 injury: a comparison with trauma controls. J Neurotrauma 2011;28:937-46

28  
29  
30 24 Hoge CW, McGurk D, Thomas, et al. Mild traumatic brain injury in U.S. Soldiers returning from Iraq. N

31  
32  
33 Engl J Med 2008;358:453-63

34  
35  
36 25 O'Donnell ML, Creamer M, Pattison P, et al. Psychiatric morbidity following injury. Am J Psychiatry 2004;

37  
38  
39 161:507-14

40  
41  
42 26 Shalev AY, Freedman S, Peri T, et al. Prospective study of posttraumatic stress disorder and depression

43  
44  
45 following trauma. Am J Psychiatry 1998;155:630-7

46  
47  
48 27 McFarlane AC, Papay P, Multiple diagnoses in posttraumatic stress disorder in the victims of a natural

49  
50  
51 disaster. J Nerv Ment Dis 1992;180:498-504

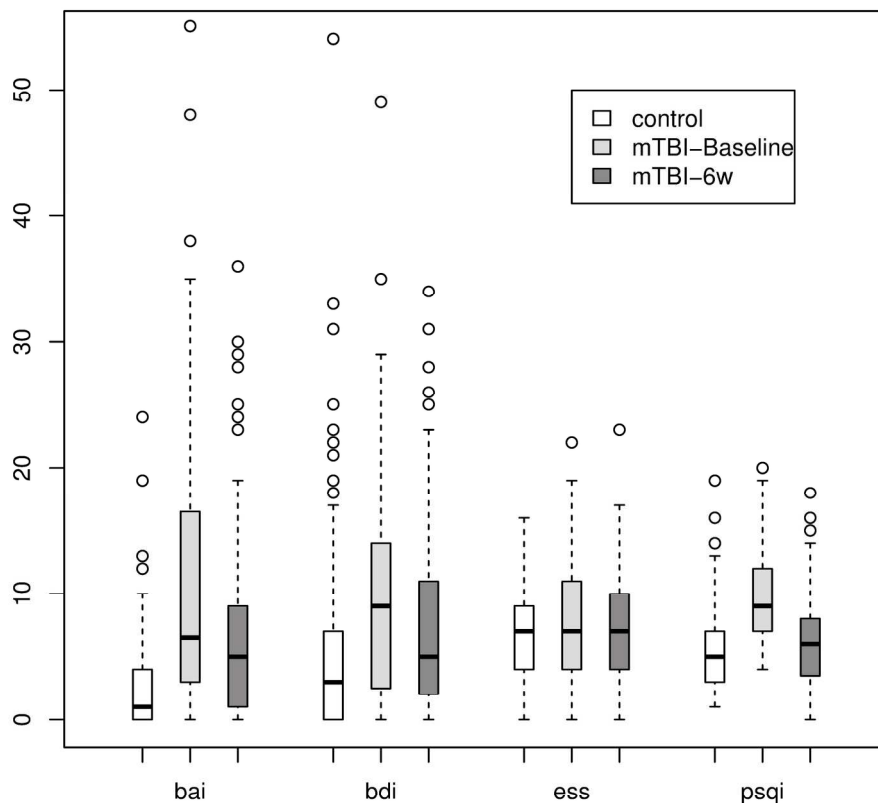

Figure 1. Box plot of the baseline and 6-wk post-injury assessments of the clinical outcomes. White bars represent the data for the control group. Light gray and dark gray bars represent the mild traumatic brain injury (mTBI) patients at baseline and 6 weeks post-injury, respectively. From left to right, the data for the Beck Anxiety Inventory (BAI), the Beck Depression Inventory-II (BDI), the Epworth Sleepiness Scale (ESS), and the Pittsburgh Sleep Quality Index (PSQI) scores are represented.  
177x177mm (300 x 300 DPI)

## STROBE Statement—checklist of items that should be included in reports of observational studies

|                              | Item No | Recommendation                                                                                                                                                                                                                                                                                                                                  |
|------------------------------|---------|-------------------------------------------------------------------------------------------------------------------------------------------------------------------------------------------------------------------------------------------------------------------------------------------------------------------------------------------------|
| <b>Title and abstract</b>    | 1       | (a) Indicate the study's design with a commonly used term in the title or the abstract<br>Page 2 – observational study<br>(b) Provide in the abstract an informative and balanced summary of what was done and what was found<br>Page 2 – results and conclusions                                                                               |
| <b>Introduction</b>          |         |                                                                                                                                                                                                                                                                                                                                                 |
| Background/rationale         | 2       | Explain the scientific background and rationale for the investigation being reported<br>Page 3                                                                                                                                                                                                                                                  |
| Objectives                   | 3       | State specific objectives, including any prespecified hypotheses<br>Page 3                                                                                                                                                                                                                                                                      |
| <b>Methods</b>               |         |                                                                                                                                                                                                                                                                                                                                                 |
| Study design                 | 4       | Present key elements of study design early in the paper<br>Page 3                                                                                                                                                                                                                                                                               |
| Setting                      | 5       | Describe the setting, locations, and relevant dates, including periods of recruitment, exposure, follow-up, and data collection<br>Page 3                                                                                                                                                                                                       |
| Participants                 | 6       | (a) <i>Case-control study</i> —Give the eligibility criteria, and the sources and methods of case ascertainment and control selection. Give the rationale for the choice of cases and controls<br>Page 3<br>(b) <i>Case-control study</i> —For matched studies, give matching criteria and the number of controls per case<br>Not matched study |
| Variables                    | 7       | Clearly define all outcomes, exposures, predictors, potential confounders, and effect modifiers. Give diagnostic criteria, if applicable<br>Page 3 & 4                                                                                                                                                                                          |
| Data sources/<br>measurement | 8*      | For each variable of interest, give sources of data and details of methods of assessment (measurement). Describe comparability of assessment methods if there is more than one group<br>Page 4                                                                                                                                                  |
| Bias                         | 9       | Describe any efforts to address potential sources of bias                                                                                                                                                                                                                                                                                       |
| Study size                   | 10      | Explain how the study size was arrived at                                                                                                                                                                                                                                                                                                       |
| Quantitative variables       | 11      | Explain how quantitative variables were handled in the analyses. If applicable, describe which groupings were chosen and why<br>Page 4                                                                                                                                                                                                          |
| Statistical methods          | 12      | (a) Describe all statistical methods, including those used to control for confounding<br>Page 4<br>(b) Describe any methods used to examine subgroups and interactions<br>(c) Explain how missing data were addressed                                                                                                                           |

|  |  |                                                                                                              |
|--|--|--------------------------------------------------------------------------------------------------------------|
|  |  | (d) <i>Cohort study</i> —If applicable, explain how loss to follow-up was addressed                          |
|  |  | <i>Case-control study</i> —If applicable, explain how matching of cases and controls was addressed           |
|  |  | <i>Cross-sectional study</i> —If applicable, describe analytical methods taking account of sampling strategy |
|  |  | Not applicable                                                                                               |
|  |  | (e) Describe any sensitivity analyses                                                                        |
|  |  | Not applicable                                                                                               |

## Results

|                   |     |                                                                                                                                                                                                                                                                                                                                                                                                                         |
|-------------------|-----|-------------------------------------------------------------------------------------------------------------------------------------------------------------------------------------------------------------------------------------------------------------------------------------------------------------------------------------------------------------------------------------------------------------------------|
| Participants      | 13* | (a) Report numbers of individuals at each stage of study—eg numbers potentially eligible, examined for eligibility, confirmed eligible, included in the study, completing follow-up, and analysed<br>Page 4<br>(b) Give reasons for non-participation at each stage<br>(c) Consider use of a flow diagram                                                                                                               |
| Descriptive data  | 14* | (a) Give characteristics of study participants (eg demographic, clinical, social) and information on exposures and potential confounders<br>Page 4 & 5, table 2<br>(b) Indicate number of participants with missing data for each variable of interest<br>(c) <i>Cohort study</i> —Summarise follow-up time (eg, average and total amount)<br>Not applicable                                                            |
| Outcome data      | 15* | <i>Cohort study</i> —Report numbers of outcome events or summary measures over time<br><i>Case-control study</i> —Report numbers in each exposure category, or summary measures of exposure<br>Page 4 & 5<br><i>Cross-sectional study</i> —Report numbers of outcome events or summary measures                                                                                                                         |
| Main results      | 16  | (a) Give unadjusted estimates and, if applicable, confounder-adjusted estimates and their precision (eg, 95% confidence interval). Make clear which confounders were adjusted for and why they were included<br>Page 5<br>(b) Report category boundaries when continuous variables were categorized<br>(c) If relevant, consider translating estimates of relative risk into absolute risk for a meaningful time period |
| Other analyses    | 17  | Report other analyses done—eg analyses of subgroups and interactions, and sensitivity analyses<br>Not applicable                                                                                                                                                                                                                                                                                                        |
| <b>Discussion</b> |     |                                                                                                                                                                                                                                                                                                                                                                                                                         |
| Key results       | 18  | Summarise key results with reference to study objectives<br>Page 6                                                                                                                                                                                                                                                                                                                                                      |

|    |                          |    |                                                                                                     |
|----|--------------------------|----|-----------------------------------------------------------------------------------------------------|
| 1  |                          |    |                                                                                                     |
| 2  | Limitations              | 19 | Discuss limitations of the study, taking into account sources of potential bias or imprecision.     |
| 3  |                          |    | Discuss both direction and magnitude of any potential bias                                          |
| 4  |                          |    | Page 6                                                                                              |
| 5  | Interpretation           | 20 | Give a cautious overall interpretation of results considering objectives, limitations, multiplicity |
| 6  |                          |    | of analyses, results from similar studies, and other relevant evidence                              |
| 7  |                          |    | Page 6 & 7                                                                                          |
| 8  | Generalisability         | 21 | Discuss the generalisability (external validity) of the study results                               |
| 9  |                          |    | Page 6 & 7                                                                                          |
| 10 |                          |    |                                                                                                     |
| 11 | <b>Other information</b> |    |                                                                                                     |
| 12 |                          |    |                                                                                                     |
| 13 | Funding                  | 22 | Give the source of funding and the role of the funders for the present study and, if applicable,    |
| 14 |                          |    | for the original study on which the present article is based                                        |
| 15 |                          |    | Page 11                                                                                             |
| 16 |                          |    |                                                                                                     |

\*Give information separately for cases and controls in case-control studies and, if applicable, for exposed and unexposed groups in cohort and cross-sectional studies.

**Note:** An Explanation and Elaboration article discusses each checklist item and gives methodological background and published examples of transparent reporting. The STROBE checklist is best used in conjunction with this article (freely available on the Web sites of PLoS Medicine at <http://www.plosmedicine.org/>, Annals of Internal Medicine at <http://www.annals.org/>, and Epidemiology at <http://www.epidem.com/>). Information on the STROBE Initiative is available at [www.strobe-statement.org](http://www.strobe-statement.org).



**Recovery from Sleep Disturbance Precedes that of Depression and Anxiety Following Mild Traumatic Brain Injury: A Six-Week Follow-up Study**

|                                 |                                                                                                                                                                                                                                                                                                                                                                                                                                                                                                                                 |
|---------------------------------|---------------------------------------------------------------------------------------------------------------------------------------------------------------------------------------------------------------------------------------------------------------------------------------------------------------------------------------------------------------------------------------------------------------------------------------------------------------------------------------------------------------------------------|
| Journal:                        | <i>BMJ Open</i>                                                                                                                                                                                                                                                                                                                                                                                                                                                                                                                 |
| Manuscript ID:                  | bmjopen-2013-004205.R1                                                                                                                                                                                                                                                                                                                                                                                                                                                                                                          |
| Article Type:                   | Research                                                                                                                                                                                                                                                                                                                                                                                                                                                                                                                        |
| Date Submitted by the Author:   | 11-Nov-2013                                                                                                                                                                                                                                                                                                                                                                                                                                                                                                                     |
| Complete List of Authors:       | Ma, Hon-Ping; Shuang Ho Hospital, Taipei Medical University, Emergency medicine<br>Ou, Ju-Chi; Shuang Ho Hospital, Taipei medical university, Emergency<br>Yeh, Chun-Ting; Shuang Ho Hospital, Taipei Medical University, Emergency medicine<br>Wu, Dean; Shuang Ho Hospital, Neurology and Sleep Center<br>Tsai, Shin-Han; Shuang Ho Hospital, Taipei medical university, Emergency<br>Chiu, Wen-Ta; Ministry of Health and Welfare,<br>Hu, Chaur-Jong; Shuang Ho Hospital, Taipei Medical University, Department of Neurology |
| <b>Primary Subject Heading</b>: | Neurology                                                                                                                                                                                                                                                                                                                                                                                                                                                                                                                       |
| Secondary Subject Heading:      | Mental health                                                                                                                                                                                                                                                                                                                                                                                                                                                                                                                   |
| Keywords:                       | Depression & mood disorders < PSYCHIATRY, Anxiety disorders < PSYCHIATRY, CLINICAL PHYSIOLOGY                                                                                                                                                                                                                                                                                                                                                                                                                                   |
|                                 |                                                                                                                                                                                                                                                                                                                                                                                                                                                                                                                                 |

SCHOLARONE™  
Manuscripts

## Recovery from Sleep Disturbance Precedes that of Depression and Anxiety Following Mild Traumatic Brain Injury: A Six-Week Follow-up Study

Hon-Ping Ma<sup>1,2</sup>; Ju-Chi Ou<sup>1</sup>; Chun-Ting Yeh<sup>1,2</sup>; Dean Wu<sup>3</sup>; Shin-Han Tsai<sup>1,2,4</sup>; Wen-Ta Chiu<sup>5</sup>; Chaur-Jong Hu<sup>3,6,7</sup>

<sup>1</sup> Department of Emergency medicine, Shuang Ho Hospital, Taipei Medical University, New Taipei City, Taiwan

<sup>2</sup> Department of Emergency medicine, School of Medicine, Taipei Medical University, Taipei, Taiwan

<sup>3</sup> Department of Neurology and Sleep Center, Shuang Ho Hospital, Taipei Medical University, New Taipei City, Taiwan

<sup>4</sup> Graduate Institute of Injury Prevention and Control, College of Public Health and Nutrition, Taipei Medical University, Taipei, Taiwan

<sup>5</sup> Ministry of Health and Welfare, Taiwan, ROC

<sup>6</sup> Department of Neurology, School of Medicine, Taipei Medical University, Taipei, Taiwan

<sup>7</sup> Department of Neurology, National Defense medical center, Taipei, Taiwan

\*Corresponding author: Chaur-Jong Hu

291, Zhongzheng Rd, Zhonghe District, New Taipei City, 23561, Taiwan

Email: [chaurjongh@s.tmu.edu.tw](mailto:chaurjongh@s.tmu.edu.tw) ; phone: 886-2-2249-0088

Keywords: mild traumatic brain injury, depression, sleep problem, anxiety

Word count: 2283

Number of reference: 29



## ABSTRACT

**Introduction:** Previous studies of recovery after mild traumatic brain injury (mTBI) have focused on chronic mental disorders. The detailed course of these disorders at the acute and subacute stages, especially with regard to recovery from sleep disturbances, **has** not been well characterized. The aim of our study was to determine the course of mental disorders, including depression, anxiety, and sleep disturbance, following mTBI.

**Methods:** We recruited 250 mTBI patients and 100 healthy participants (control group) for our observational study between January 2011 to July 2012. The mTBI and control participants were assessed at baseline and 6 weeks after mTBI using the Beck Anxiety Inventory (BAI), the Beck Depression Inventory II (BDI), the Epworth Sleepiness Scale (ESS), and the Pittsburgh Sleep Quality Index (PSQI).

**Results:** The ESS scores were not significantly different between the 2 groups at baseline or at 6 weeks after mTBI. Although the BAI, BDI, and PSQI scores of the mTBI group were significantly different than those of the control group at baseline, all had improved significantly 6 weeks later. However, only the PSQI score improved to a level that was not significantly different from that of the control group.

**Conclusions:** Daytime sleepiness is not affected by mTBI. However, mTBI causes depression and anxiety and **diminished** sleep quality. Although all these conditions improve significantly within 6 weeks post-mTBI, only sleep quality improves to a pre-mTBI level. Thus, recovery from mTBI-induced sleep disturbance occurs more rapidly than that of mTBI-induced depression and anxiety.

### Article summary

- 100 mTBI patients and the 137 control participants who completed the questionnaires.
- The number of women is more than the number of men that joined our study
- Sleep disturbance, depression, anxiety improved after 6 weeks post-injury.
- Recovery from sleep disturbance occurred more rapidly

### Strengths and limitations of this study

Previous reports of the incidence of insomnia among post-acute TBI patients have ranged from 2% to 56%. In our study, 90% of the mTBI patients and 44% of the control participants reported sleep disturbances. Our data showed that recovery from sleep disturbance occurred more rapidly among the mTBI patients than did recovery from post-injury depression and anxiety. Previous studies have demonstrated significant changes in anxiety- and depression-related symptoms between 1 week and 3 months following mTBI. We observed improvement in the depression and anxiety assessment scores in our mTBI cohort at 6 weeks post-injury. Nonetheless, the BDI and the BAI scores differed significantly between the mTBI and control groups at the 6 week post-injury assessment.

Some of our mTBI patients may have used medications before or after suffering mTBI that may have influenced their assessment scores. It is also possible that some of our mTBI patients may have had unrelated diseases or pre-injury conditions that were not identified before or during their participation in our study. In addition, we investigated only the subacute stages of depression, anxiety, and diminished sleep quality, rather than the chronic stages of these diseases.

## INTRODUCTION

Traumatic brain injury (TBI) and mild traumatic brain injury (mTBI) are major public health problems. Studies in Australia have estimated lifetime costs of over \$2.5 million per TBI survivor [1]. Headache, blurred vision, fatigue, and sleep disturbance are the most common physical symptoms following brain injury [2]. Previous studies have reported that the symptom scores following mTBI were equal to that of control patients within 7 days post-injury [3].

However, increasing evidence suggests that the risk of developing a psychiatric disorder increases following mTBI [4]. Although multiple studies have investigated post-traumatic stress disorder (PTSD), the risk of other disorders, such as depression, have also been found to increase following mTBI [5]. The most common psychiatric disorders during the first 12 months following injury are depression, anxiety disorder, and agoraphobia [4].

Diminished sleep quality is one of the most commonly reported symptoms following mTBI [6], and depression and anxiety are also prevalent. However, these conditions are often under-reported, and may become chronic in the absence of treatment. The objectives of our study were to characterize the course of post-mTBI depression, anxiety, and diminished sleep quality during a 6-week follow up, and to compare the baseline and 6-week clinical assessments of mTBI patients with those of healthy participants.

## METHODS

### Participants and Study Design

Our prospective study was approved by the Joint Institutional Review Board of Taipei Medical University. Eligible patients aged  $\geq 20$  years who were treated in an emergency room within 24 hours after closed head trauma were recruited from 3 hospitals in Taiwan between January 2011 and July 2012. The definition of mTBI was based on the diagnostic criteria established by the American Congress of Rehabilitation Medicine, which consist of a Glasgow Coma Scale (GCS) score of 13 to 15 at presentation and loss of consciousness for  $< 30$  min. Patients with a history of cerebrovascular disease, mental retardation, previous TBI, epilepsy, or severe systemic medical illness were excluded from our study. The inclusion of the healthy control participants were no brain injury history and older than 20 years old.

Patients were initially contacted by phone. A total of 607 mTBI patients were recruited for our study, among whom 250 (41.19%) provided informed consent, and completed a baseline assessment during an initial evaluation within 1 month after experiencing an mTBI. Six weeks after completing the baseline assessment, 100 (40%) of the mTBI patients completed the final assessment. The baseline and 6-week assessments consisted of 4 investigator-administered questionnaires, namely, the Beck Anxiety Inventory (BAI) [7], the Beck Depression Inventory-II (BDI) [8], the Epworth Sleepiness Scale (ESS) [9], and the Pittsburgh Sleep Quality Index (PSQI) [10].

## Outcome Measures

The patients' demographic information, injury-related data, and smoking and drinking history were recorded at the baseline evaluation. Chinese versions of the BDI, the BAI, the ESS, and the PSQI were used in our study [11-13]. Depression was assessed using the BDI, which scored the patient's selection of 1 of 4 possible responses to 21 multiple-choice items on a scale of 0 to 3 based on their response. The severity of anxiety symptoms was assessed using the BAI, which also scored the patient's selection of 1 of 4 possible responses to 21 multiple-choice items on a scale of 0 to 3 based on their response. A high score on the BAI indicates a high level of anxiety. Daytime sleepiness was subjectively assessed using the ESS, which asked the patient to rate their risk of falling asleep on a 4-point Likert scale (0-3) in 8 different situations. Overall sleep quality was assessed using the PSQI, which evaluated 7 aspects of sleep quality. A high overall score on the PSQI indicates poor sleep quality.

## Statistical methods

Associations between the categorical variables were evaluated using a chi-squared analysis, and the Fisher exact test was used when at least one of the values was  $<5$ . Associations between the normally distributed continuous variables were evaluated using  $t$  tests, and the Mann-Whitney U test was used to evaluate the continuous variables with an asymmetrical distribution. Paired  $t$  tests and a paired Mann-Whitney U test were used to evaluate the intragroup differences between the baseline and 6-week assessments for normally and asymmetrically distributed data, respectively. **In this study, all outcome were abnormally distributed thus the non-parametric method was used. In addition, Generalized linear regression** analyses were conducted for outcomes with or without adjustment for age and sex. All the statistical analyses were performed using the R statistical software, version 3.0.1 for Windows (R Foundation for Statistical Computing, Vienna, Austria). The level of statistical significance was set at  $P < .05$ .

## RESULTS

The demographic information and clinical data of all the mTBI and control **participates** who were initially enrolled in the study are shown in Table 1. Six weeks following their baseline assessment, 150 patients could not be contacted, or declined to participant further in our study. The age; sex; education level; smoking status; alcohol use; proportion reporting depression; mechanism of injury; and GCS, BDI, ESS scores of patients who completed the study did not differ significantly from those of patients who did not complete the study. The patients who did not complete the study had lower mean scores for the BAI and the PSQI than the patients who completed the study.

The demographic information and clinical data of the 100 mTBI patients and the 137 control

1  
2  
3 participants who completed the study are shown in Table 2. The mean age of the mTBI group  
4 was significantly higher than the mean age of the control group. The proportions reporting  
5 alcohol use, headache, and depression were significantly different between the mTBI and  
6 control groups. The percentages of mTBI patients who reported headache or depression were  
7 higher than those of the control group. Transportation accidents and falls caused 39% and  
8 34% of the mTBI cases, respectively. Considering the clinical cut-off for each questionnaire,  
9 most control patients did not have depression, anxiety, daytime sleepiness, or diminished  
10 sleep quality, whereas most of mTBI patients had high PSQI scores.

11  
12 The mean scores of the 4 outcome measures are shown in Figure 1. The average scores  
13 for the mTBI patients at baseline were the highest. After 6 weeks, the average scores for the  
14 mTBI patients decreased. The differences between the outcomes of the mTBI and control  
15 groups are shown in Table 3. The average baseline and 6-week BAI scores for mTBI group  
16 were 10.74 and 7.23, respectively. The BAI scores of the patients in the mTBI group  
17 significantly improved at 6 weeks post-injury. However, the mean BAI scores for the mTBI  
18 group for both the baseline and 6 week assessments were significantly different from those of  
19 the control group at the baseline assessment. The mean BDI scores of the mTBI group were  
20 9.8 and 7.99 at the baseline and 6-week assessments, respectively. The mean BDI score for  
21 mTBI group significantly decreased to the value of 1.81 at 6 weeks post-injury. The mean  
22 BDI score of the control group was 5.72. The mean BDI scores of the mTBI group were  
23 significantly different from those of the control group.

24  
25 No significant difference was observed between the baseline and 6-week ESS scores for  
26 the mTBI group. The mean daytime sleepiness score for the control group was 6.62, which  
27 was not significantly different from that of the mTBI group. The mean baseline PSQI score  
28 for the mTBI group was greater than 9, which was higher than the clinical cut-off point of 5.  
29 In addition, the mean PSQI score of mTBI at baseline assessment was higher than the mean  
30 score of 5.7 for the control group. The mean 6-week PSQI score for the mTBI group  
31 improved significantly to 6.4. The sleep quality of the mTBI group at 6 weeks post-injury  
32 was not significantly different from that of the control group. Because of the significant  
33 difference in mean age between the mTBI and control groups and the predominance of  
34 women in both groups, we performed generalized linear regression analysis of the outcome  
35 measures with adjusting for age and sex (Table 4). The differences in depression, anxiety,  
36 and sleep quality between the mTBI and control patients kept significance after adjusting for  
37 age or sex. However, sex was found to be a significant predictor of sleep quality, anxiety, and  
38 depression in the baseline and 6-week assessments. After adjusting for age and sex, the ESS  
39 score was significantly different between the control and mTBI groups at the baseline and  
40 6-week assessments, and age was determined to be a significant predictor of daytime  
41 sleepiness. In addition, the scores for all 4 outcome measures were higher among women than  
42 among men.

## DISCUSSION

Previous studies have shown that 85% of mTBI patients demonstrate improvement in psychiatric-related symptoms, whereas the remainder develop chronic psychosocial problems [14-16]. Often presenting with anxiety, depression, or sleep disturbances, TBI patients are at an increased risk of developing a psychiatric disorder within 3 months to 1 year post-injury [4]. It is unclear whether post-mTBI sleep disturbances are related to depression or anxiety. Thus, sleep disturbance may be a risk factor of subsequent depression. A meta-analysis of 21 studies demonstrated that insomnia patients have a 2-fold risk of developing depression [17]. The detailed course of post-mTBI depression, anxiety, and diminished sleep quality, especially during the early stages of recovery, have not been well characterized.

We examined the early stages of recovery from mTBI by using self-reported measures of depression, anxiety, sleep quality, and daytime sleepiness. **Most of them injured by transportation accident and falls. Other mechanism of injury included hit by something, and sport injury. There was no participant who injured by an industrial accident.** We determined that daytime sleepiness is not significantly affected by mTBI. Both the anxiety and depression symptoms in the mTBI group improved by the sixth week of recovery, but remained more severe than those of the control participants. However, sleep quality significantly improved within 6 weeks of experiencing mTBI, returning to a level that did not differ significantly from that of the control group. These results indicate that recovery from diminished sleep quality occurred more rapidly than did recovery from depression and anxiety.

Our prospective cohorts contained more women than men, and the mean ages of the mTBI and control groups differed significantly. Thus, we adjusted our analysis for effects of age and sex. The BAI, BDI, PSQI, and ESS scores were influenced by sex. However, our results demonstrated that the BAI, BDI, and PSQI scores were significantly affected by mTBI, whereas the ESS scores were not. We found the women in the mTBI group reported more severe symptoms for depression, anxiety, and diminished sleep quality at baseline. After 6 weeks of recovery, although the depression- and anxiety-related symptoms of both male and female mTBI patients improved, those of the female mTBI patients remained more severe than those of the male mTBI patients. Female mTBI patients also reported more severe symptoms related to diminished sleep quality and daytime sleepiness than did male mTBI patients.

Previous reports of the incidence of insomnia among post-acute TBI patients have ranged from 2% to 56% [18, 19]. Bryan found that sleep disturbance increases in patients who suffer repetitive TBI [20]. In our study, 90% of the mTBI patients and 44% of the control participants reported sleep disturbances. **The average score of PSQI in the control group (5.7) is higher than previously published values (2.7) [10], but it is close to the result of**



1  
2  
3 another study in Taiwan also by use of the Chinese PSQI study in healthy group (5.7) [13]. It  
4 may result from the different versions of questionnaire (English and Chinese) or other  
5 uncertain reasons. Our data showed that recovery from sleep disturbance occurred more  
6 rapidly among the mTBI patients than did recovery from post-injury depression and anxiety.  
7 There are 2 possible reasons for this finding. Sleep disturbance may be an independent  
8 symptom of mTBI that alters the circadian rhythm through injury-related changes in gene  
9 expression [21]. Alternatively, sleep disturbance may simply be a symptom of depression or  
10 anxiety that improves early during recovery [22].

11  
12  
13  
14  
15 Previous studies have demonstrated significant changes in anxiety- and  
16 depression-related symptoms between 1 week and 3 months following mTBI [23]. We  
17 observed improvement in the depression and anxiety assessment scores in our mTBI cohort at  
18 6 weeks post-injury. Nonetheless, the BDI and the BAI scores differed significantly between  
19 the mTBI and control groups at the 6 week post-injury assessment.

20  
21  
22 Depression and PTSD have been shown to be critical mediators of the recovery of  
23 physical health following mTBI [24]. Multiple studies have investigated the incidence of  
24 PTSD following TBI [25]. Psychiatric comorbidities have been associated with PTSD  
25 following TBI, and depression was shown to be a predictor of the post-TBI chronicity of  
26 PTSD [26, 27]. We did not explore the role of PTSD in recovery from depression, anxiety,  
27 and diminished sleep quality, but we speculate that PTSD is associated with all of these  
28 mental disorders in mTBI patients.

29  
30  
31  
32 Certain limitations to our findings should be considered. First, some of our mTBI  
33 patients may have used medications before or after suffering mTBI that may have influenced  
34 their assessment scores. Second, it is possible that some of our mTBI patients may have had  
35 unrelated diseases or pre-injury conditions that were not identified before or during their  
36 participation in our study. Third, we investigated only the subacute stages of depression,  
37 anxiety, and diminished sleep quality, rather than the chronic stages of these diseases. In  
38 addition, REM sleep plays an important role in mood disorders. The changes of REM sleep  
39 after mTBI are still controversial[28, 29]. This is certainly a major issue for study. However,  
40 sleep architecture was not measured in our study. Although long-term observational studies  
41 are required to confirm our findings, our results provide valuable information for  
42 understanding the development and recovery of mental disorders following mTBI.  
43  
44  
45  
46  
47  
48  
49  
50  
51  
52  
53  
54  
55  
56  
57  
58  
59  
60



**Table 1.** The demographic and clinical data of all mTBI patients initially enrolled in our study

|                            | Lost to follow up | Completed 6-wk follow up | <i>P</i> value |
|----------------------------|-------------------|--------------------------|----------------|
| Age (y)                    | 38.88             | 39.53                    | NS             |
| Male / Female (n)          | 56/94             | 35/65                    | NS             |
| Education (y)              | 15.04             | 15.46                    | NS             |
| Smoker (N/Y)               | 113 / 37          | 82 / 18                  | NS             |
| Drink alcohol (N/Y)        | 94/56             | 58/ 42                   | NS             |
| Headache (N/Y)             | 50/100            | 25/75                    | .02            |
| Depression (N/Y)           | 91 / 59           | 51 / 49                  | NS             |
| GCS                        | 14.80             | 14.98                    | NS             |
| <b>Mechanism of Injury</b> |                   |                          |                |
| Transportation accident    | 77                | 39                       | NS             |
| Falls                      | 40                | 34                       |                |
| Other                      | 33                | 27                       |                |
| BAI                        | 7.85              | 10.74                    | .03            |
| BDI                        | 8.19              | 9.80                     | NS             |
| ESS                        | 6.89              | 7.95                     | NS             |
| PSQI                       | 6.27              | 9.51                     | <.01           |

mTBI: mild traumatic brain injury; NS:  $P > .05$ ; GCS: Glasgow Coma Scale; BAI: Beck Anxiety Inventory; BDI: Beck Depression Inventory-II; ESS: Epworth Sleepiness Scale; PSQI: Pittsburgh Sleep Quality Index

**Table 2.** The demographic and clinical data of the mTBI patients and the control participants who completed the 6-week follow up

|                             | mTBI    | Control  | <i>P</i> value |
|-----------------------------|---------|----------|----------------|
| Sample size (n)             | 100     | 137      |                |
| Age (y)                     | 39.53   | 29.86    | <.001          |
| Male / Female (n)           | 35/65   | 47/90    | NS             |
| Education (y)               | 15.46   | 14.91    | .045           |
| Smoker (N/Y)                | 82/18   | 115/22   | NS             |
| Drink (N/Y)                 | 58/42   | 51/82    | <.01           |
| Headache (N/Y)              | 25/75   | 98/39    | <.01           |
| Depression (N/Y)            | 51 / 49 | 103/ 34  | <.01           |
| GCS                         | 14.98   | -        | -              |
| <b>Questionnaires</b>       |         |          |                |
| BAI>7 (N/Y)                 | 57 / 43 | 125 / 12 | <.01           |
| BDI>9 (N/Y)                 | 53 / 47 | 111 / 26 | <.01           |
| ESS >9 (N/Y)                | 66 / 34 | 108 / 29 | <.01           |
| PSQI >5 (N/Y)               | 10 / 90 | 77 / 60  | <.01           |
| <b>Mechanisms of Injury</b> |         |          |                |
| Transportation accident     | 39      | -        | -              |
| Falls                       | 34      | -        | -              |
| Other                       | 27      | -        | -              |

mTBI: mild traumatic brain injury; NS:  $P > .05$ ; GCS: Glasgow Coma Scale; BAI: Beck Anxiety Inventory; BDI: Beck Depression Inventory-II; ESS: Epworth Sleepiness Scale; PSQI: Pittsburgh Sleep Quality Index

**Table 3.** Differences between control participants and mTBI patients at baseline and 6 weeks post-injury

|                                         | BAI   | BDI   | ESS  | PSQI  |
|-----------------------------------------|-------|-------|------|-------|
| mTBI Baseline vs Control                | 8.02* | 4.08* | 1.33 | 3.81* |
| mTBI 6 wk vs Control                    | 4.51* | 2.27* | 0.87 | 0.7   |
| mTBI Baseline vs mTBI 6 wk <sup>+</sup> | 3.51* | 1.81* | 0.46 | 3.11* |

mTBI: mild traumatic brain injury; BAI: Beck Anxiety Inventory; BDI: Beck Depression Inventory-II; ESS: Epworth Sleepiness Scale; PSQI: Pittsburgh Sleep Quality Index

\* $P < .05$

<sup>+</sup>paired  $t$  test

**Table 4.** Coefficients of generalized linear model between control participants and mTBI patients at baseline and 6 weeks post-injury

|       | <u>Control vs mTBI (baseline)</u> |        |         |        | <u>Control vs mTBI (6-week)</u> |        |         |        |
|-------|-----------------------------------|--------|---------|--------|---------------------------------|--------|---------|--------|
|       | BAI                               | BDI    | ESS     | PSQI   | BAI                             | BDI    | ESS     | PSQI   |
| mTBI  | 1.4*                              | 0.567* | 0.245*  | 0.487* | 1.026*                          | 2.632* | 1.309*  | 0.557  |
| Age   | 0.0007                            | -0.003 | -0.007* | 0.003  | -0.001                          | -0.035 | -0.045* | 0.016  |
| Women | 0.437*                            | 0.056* | 0.137*  | 0.137* | 0.562*                          | 2.945* | 1.263*  | 1.170* |

mTBI: mild traumatic brain injury; BAI: Beck Anxiety Inventory; BDI: Beck Depression Inventory-II; ESS: Epworth Sleepiness Scale; PSQI: Pittsburgh Sleep Quality Index

\* $P < .05$

**Conflict of interest**

None declared.

**Acknowledgments**

This study was supported by grants from the National Science Council, Taiwan (NSC 98-2321-B-038-005-MY3, NSC 101-2321-B-038-005, DOH 101-TD-B-111-003).

**Data sharing**

There is no additional data available.

**Contributorship statement**

The six authors are justifiably credited with authorship, according to the authorship criteria.

In detail: Hon-Ping Ma

– conception, design and interpretation of data, drafting of the manuscript, final approval given; Ju-Chi Ou—analysis and interpretation of data, drafting of the manuscript, final approval given; Chun-Ting Yeh

– acquisition of data, final approval given; Dean Wu – final approval given; Shin-Han Tsai – final approval given; Wen-Ta Chiu – Conception, design, final approval given; Chaur-Jong Hu – Conception, design, analysis and interpretation of data, drafting of the manuscript, final approval given.

## References

- 1 Access Economics Pty Limited. The Economic Cost of Spinal Cord Injury and Traumatic Brain injury in Australia. Geelong, Victoria, Australia: Victorian Neurotrauma Initiative; 2009.
- 2 U.S. Department of Veterans Affairs. VA/DoD clinical practice guideline for management of concussion/mild traumatic brain injury. Washington, DC: U.S. Department of Defense; April 2009.  
[http://www.healthquality.va.gov/mtbi/concussion\\_mtbi\\_full\\_1\\_0.pdf](http://www.healthquality.va.gov/mtbi/concussion_mtbi_full_1_0.pdf). Assessed June, 18, 2013
- 3 McCrea M, Iverson GL, McAllister TW, et al. An integrated review of recovery after mild traumatic brain injury(MTBI): implications for clinical management. Clin Neuropsychol. 2009;**23**:1368-90
- 4 Bryant RA, O'Donnell M, Creamer M, et al. The psychiatric sequelae of traumatic injury. Am J Psychiatry 2010 ;**167** :312-320
- 5 O'Donnell ML, Creamer M, Bryant RA, et al. Posttraumatic disorders following injury: an empirical and methodological review. Clin Psychol Rev 2003;**23**:587-603
- 6 Orff H, Ayalon L, Drummond S. Traumatic brain injury and sleep disturbance: a review of current research. J Head Trauma Rehabil 2009;**24**:155-65
- 7 Beck AT, Epstein N, Brown G, et al. An inventory for measuring clinical anxiety: Psychometric properties. J Consult Clin Psychol 1988; **56**:893-7
- 8 Beck AT, Steer RA, Brown GK. Manual for the Beck Depression Inventory-II. San Antonio, TX: Psychological Corporation; 1996
- 9 John MW. A new method for measuring daytime sleepiness: the Epworth Sleepiness Scale. Sleep 1991; **14**:540-5

- 1  
2  
3  
4 10 Buysse DJ, Reynolds CF, Monk TH, et al. The Pittsburgh Sleep Quality index: a new instrument for  
5  
6 psychiatric practice and research. *Psychiatry Research*. 1989;**28**:193-213  
7  
8  
9  
10 11 Zheng YP, Wei LA, Goa LG, et al. Applicability of the Chinese Beck Depression Inventory. *Compr*  
11  
12 *Psychiatry*. 1988;**29**:484-9  
13  
14  
15 12 Chen NH, Johns MW, Li HY, et al. Validatio of a Chinese version of the Epworth Sleepiness Scale. *Qual life*  
16  
17 *Res*. 2002;**11**:817-21  
18  
19  
20  
21 13 Tsai PS, Wang SY, Wang MY, et al. Psychometric evaluation of the Chinese version of the Pittsburgh Sleep  
22  
23 *Quality index in primary insomnia and control subjects*. *Qual Life Res*. 2005 **14**; 1943-52  
24  
25  
26  
27 14 Ruff R. Two decades of advances in understanding of mild traumatic brain injury. *J Head Trauma Rehabil*  
28  
29 *2005; 20*:5-18  
30  
31  
32  
33 15 Wood RL. Understanding the ‘miserable minority’: A diathesis-stress paradigm for postconcussional  
34  
35 *syndrome*. *Brain Injury* 2004;**18**:1135-1153  
36  
37  
38  
39 16 Bazarian J, McClung J, Shah M, et al. Mild traumatic brain injury in the US 1998-2000. *Brain Injury*  
40  
41 *2005;19*:85-91  
42  
43  
44 17 Baglioni C, Battagliese G, Feige B, et al. Insomnia as a predictor of depression: a meta-analytic evaluation of  
45  
46 *longitudinal epidemiological studies*. *J Affect Disord* 2011;**135**:10-19  
47  
48  
49  
50 18 Rutherford WH, Merrett JD, McDonald JR. Symptoms at one year following concussion from minor head  
51  
52 *injuries*. *Injury* 1977; **1**:1-4  
53  
54  
55  
56 19 Beetar JT, Guilmette TJ, Sparadeo FR. Sleep and pain complaints in symptomatic traumatic brain injury and  
57  
58  
59  
60

- 1  
2  
3  
4 neurologic populations. Archives of Physical Medicine and Rehabilitation 1996;77:1298-1302  
5  
6  
7 20 Bryan CJ. Repetitive Traumatic Brain injury (or Concussion) Increases Severity of Sleep Disturbance among  
8  
9  
10 Deployed Military Personnel. Sleep 2013;1;36:941-6  
11  
12  
13 21 Palagini L, Biber K, Riemann D. The genetics of insomnia – evidence for epigenetic mechanisms? Sleep  
14  
15  
16 Med Rev. 2013;1-11  
17  
18  
19 22 Breslau N, Roth T, Rosenthal L, Andreski P. Sleep disturbance and psychiatric disorders: a longitudinal  
20  
21  
22 epidemiological study of young adults. Biol Psychiatry 1996;30:411-8  
23  
24  
25 23 Ponsford J, Cameron P, Fitzgerald M, et al. Long-term outcomes after uncomplicated mild traumatic brain  
26  
27  
28 injury: a comparison with trauma controls. J Neurotrauma 2011;28:937-46  
29  
30  
31 24 Hoge CW, McGurk D, Thomas, et al. Mild traumatic brain injury in U.S. Soldiers returning from Iraq. N  
32  
33  
34 Engl J Med 2008;358:453-63  
35  
36  
37 25 O'Donnell ML, Creamer M, Pattison P, et al. Psychiatric morbidity following injury. Am J Psychiatry 2004;  
38  
39  
40 161:507-14  
41  
42  
43 26 Shalev AY, Freedman S, Peri T, et al. Prospective study of posttraumatic stress disorder and depression  
44  
45  
46 following trauma. Am J Psychiatry 1998;155:630-7  
47  
48  
49 27 McFarlane AC, Papay P, Multiple diagnoses in posttraumatic stress disorder in the victims of a natural  
50  
51  
52 disaster. J Nerv Ment Dis 1992;180:498-504  
53  
54  
55 28 Gosselin N, Lassonde M, Petit D, et al. Sleep following sport-related concussions. Sleep Med 2009;10 :35-46  
56  
57  
58 29 Shekleton JA, Parcell DL, Redman JR, et al. Sleep disturbance and melatonin levels following traumatic  
59  
60 brain injury. Neurology 2010;74: 1732-8



## Recovery from Sleep Disturbance Precedes that of Depression and Anxiety Following Mild Traumatic Brain Injury: A Six-Week Follow-up Study

Hon-Ping Ma<sup>1,2</sup>; Ju-Chi Ou<sup>1</sup>; Chun-Ting Yeh<sup>1,2</sup>; Dean Wu<sup>3</sup>; Shin-Han Tsai<sup>1,2,4</sup>; Wen-Ta Chiu<sup>5</sup>; Chaur-Jong Hu<sup>3,6,7</sup>

<sup>1</sup> Department of Emergency medicine, Shuang Ho Hospital, Taipei Medical University, New Taipei City, Taiwan

<sup>2</sup> Department of Emergency medicine, School of Medicine, Taipei Medical University, Taipei, Taiwan

<sup>3</sup> Department of Neurology and Sleep Center, Shuang Ho Hospital, Taipei Medical University, New Taipei City, Taiwan

<sup>4</sup> Graduate Institute of Injury Prevention and Control, College of Public Health and Nutrition, Taipei Medical University, Taipei, Taiwan

<sup>5</sup> Ministry of Health and Welfare, Taiwan, ROC

<sup>6</sup> Department of Neurology, School of Medicine, Taipei Medical University, Taipei, Taiwan

<sup>7</sup> Department of Neurology, National Defense medical center, Taipei, Taiwan

\*Corresponding author: Chaur-Jong Hu

291, Zhongzheng Rd, Zhonghe District, New Taipei City, 23561, Taiwan

Email: [chaurjongh@s.tmu.edu.tw](mailto:chaurjongh@s.tmu.edu.tw) ; phone: 886-2-2249-0088

Keywords: mild traumatic brain injury, depression, sleep problem, anxiety

Word count: 2283

Number of reference: 29

## ABSTRACT

**Introduction:** Previous studies of recovery after mild traumatic brain injury (mTBI) have focused on chronic mental disorders. The detailed course of these disorders at the acute and subacute stages, especially with regard to recovery from sleep disturbances, **has** not been well characterized. The aim of our study was to determine the course of mental disorders, including depression, anxiety, and sleep disturbance, following mTBI.

**Methods:** We recruited 250 mTBI patients and 100 healthy participants (control group) for our observational study between January 2011 to July 2012. The mTBI and control participants were assessed at baseline and 6 weeks after mTBI using the Beck Anxiety Inventory (BAI), the Beck Depression Inventory II (BDI), the Epworth Sleepiness Scale (ESS), and the Pittsburgh Sleep Quality Index (PSQI).

**Results:** The ESS scores were not significantly different between the 2 groups at baseline or at 6 weeks after mTBI. Although the BAI, BDI, and PSQI scores of the mTBI group were significantly different than those of the control group at baseline, all had improved significantly 6 weeks later. However, only the PSQI score improved to a level that was not significantly different from that of the control group.

**Conclusions:** Daytime sleepiness is not affected by mTBI. However, mTBI causes depression and anxiety and **diminished** sleep quality. Although all these conditions improve significantly within 6 weeks post-mTBI, only sleep quality improves to a pre-mTBI level. Thus, recovery from mTBI-induced sleep disturbance occurs more rapidly than that of mTBI-induced depression and anxiety.

### Article summary

- 100 mTBI patients and the 137 control participants who completed the questionnaires.
- The number of women is more than the number of men that joined our study
- Sleep disturbance, depression, anxiety improved after 6 weeks post-injury.
- Recovery from sleep disturbance occurred more rapidly

### Strengths and limitations of this study

Previous reports of the incidence of insomnia among post-acute TBI patients have ranged from 2% to 56%. In our study, 90% of the mTBI patients and 44% of the control participants reported sleep disturbances. Our data showed that recovery from sleep disturbance occurred more rapidly among the mTBI patients than did recovery from post-injury depression and anxiety. Previous studies have demonstrated significant changes in anxiety- and depression-related symptoms between 1 week and 3 months following mTBI. We observed improvement in the depression and anxiety assessment scores in our mTBI cohort at 6 weeks post-injury. Nonetheless, the BDI and the BAI scores differed significantly between the mTBI and control groups at the 6 week post-injury assessment.

Some of our mTBI patients may have used medications before or after suffering mTBI that may have influenced their assessment scores. It is also possible that some of our mTBI patients may have had unrelated diseases or pre-injury conditions that were not identified before or during their participation in our study. In addition, we investigated only the subacute stages of depression, anxiety, and diminished sleep quality, rather than the chronic stages of these diseases.

## INTRODUCTION

Traumatic brain injury (TBI) and mild traumatic brain injury (mTBI) are major public health problems. Studies in Australia have estimated lifetime costs of over \$2.5 million per TBI survivor [1]. Headache, blurred vision, fatigue, and sleep disturbance are the most common physical symptoms following brain injury [2]. Previous studies have reported that the symptom scores following mTBI were equal to that of control patients within 7 days post-injury [3].

However, increasing evidence suggests that the risk of developing a psychiatric disorder increases following mTBI [4]. Although multiple studies have investigated post-traumatic stress disorder (PTSD), the risk of other disorders, such as depression, have also been found to increase following mTBI [5]. The most common psychiatric disorders during the first 12 months following injury are depression, anxiety disorder, and agoraphobia [4].

Diminished sleep quality is one of the most commonly reported symptoms following mTBI [6], and depression and anxiety are also prevalent. However, these conditions are often under-reported, and may become chronic in the absence of treatment. The objectives of our study were to characterize the course of post-mTBI depression, anxiety, and diminished sleep quality during a 6-week follow up, and to compare the baseline and 6-week clinical assessments of mTBI patients with those of healthy participants.

## METHODS

### Participants and Study Design

Our prospective study was approved by the Joint Institutional Review Board of Taipei Medical University. Eligible patients aged  $\geq 20$  years who were treated in an emergency room within 24 hours after closed head trauma were recruited from 3 hospitals in Taiwan between January 2011 and July 2012. The definition of mTBI was based on the diagnostic criteria established by the American Congress of Rehabilitation Medicine, which consist of a Glasgow Coma Scale (GCS) score of 13 to 15 at presentation and loss of consciousness for  $< 30$  min. Patients with a history of cerebrovascular disease, mental retardation, previous TBI, epilepsy, or severe systemic medical illness were excluded from our study. The inclusion of the healthy control participants were no brain injury history and older than 20 years old.

Patients were initially contacted by phone. A total of 607 mTBI patients were recruited for our study, among whom 250 (41.19%) provided informed consent, and completed a baseline assessment during an initial evaluation within 1 month after experiencing an mTBI. Six weeks after completing the baseline assessment, 100 (40%) of the mTBI patients completed the final assessment. The baseline and 6-week assessments consisted of 4 investigator-administered questionnaires, namely, the Beck Anxiety Inventory (BAI) [7], the Beck Depression Inventory-II (BDI) [8], the Epworth Sleepiness Scale (ESS) [9], and the Pittsburgh Sleep Quality Index (PSQI) [10].

## Outcome Measures

The patients' demographic information, injury-related data, and smoking and drinking history were recorded at the baseline evaluation. Chinese versions of the BDI, the BAI, the ESS, and the PSQI were used in our study [11-13]. Depression was assessed using the BDI, which scored the patient's selection of 1 of 4 possible responses to 21 multiple-choice items on a scale of 0 to 3 based on their response. The severity of anxiety symptoms was assessed using the BAI, which also scored the patient's selection of 1 of 4 possible responses to 21 multiple-choice items on a scale of 0 to 3 based on their response. A high score on the BAI indicates a high level of anxiety. Daytime sleepiness was subjectively assessed using the ESS, which asked the patient to rate their risk of falling asleep on a 4-point Likert scale (0-3) in 8 different situations. Overall sleep quality was assessed using the PSQI, which evaluated 7 aspects of sleep quality. A high overall score on the PSQI indicates poor sleep quality.

## Statistical methods

Associations between the categorical variables were evaluated using a chi-squared analysis, and the Fisher exact test was used when at least one of the values was  $<5$ . Associations between the normally distributed continuous variables were evaluated using  $t$  tests, and the Mann-Whitney U test was used to evaluate the continuous variables with an asymmetrical distribution. Paired  $t$  tests and a paired Mann-Whitney U test were used to evaluate the intragroup differences between the baseline and 6-week assessments for normally and asymmetrically distributed data, respectively. In this study, all outcome were abnormally distributed thus the non-parametric method was used. In addition, Generalized linear regression analyses were conducted for outcomes with or without adjustment for age and sex. All the statistical analyses were performed using the R statistical software, version 3.0.1 for Windows (R Foundation for Statistical Computing, Vienna, Austria). The level of statistical significance was set at  $P < .05$ .

## RESULTS

The demographic information and clinical data of all the mTBI and control participants who were initially enrolled in the study are shown in Table 1. Six weeks following their baseline assessment, 150 patients could not be contacted, or declined to participate further in our study. The age; sex; education level; smoking status; alcohol use; proportion reporting depression; mechanism of injury; and GCS, BDI, ESS scores of patients who completed the study did not differ significantly from those of patients who did not complete the study. The patients who did not complete the study had lower mean scores for the BAI and the PSQI than the patients who completed the study.

The demographic information and clinical data of the 100 mTBI patients and the 137 control

1  
2  
3 participants who completed the study are shown in Table 2. The mean age of the mTBI group  
4 was significantly higher than the mean age of the control group. The proportions reporting  
5 alcohol use, headache, and depression were significantly different between the mTBI and  
6 control groups. The percentages of mTBI patients who reported headache or depression were  
7 higher than those of the control group. Transportation accidents and falls caused 39% and  
8 34% of the mTBI cases, respectively. Considering the clinical cut-off for each questionnaire,  
9 most control patients did not have depression, anxiety, daytime sleepiness, or diminished  
10 sleep quality, whereas most of mTBI patients had high PSQI scores.

11  
12 The mean scores of the 4 outcome measures are shown in Figure 1. The average scores  
13 for the mTBI patients at baseline were the highest. After 6 weeks, the average scores for the  
14 mTBI patients decreased. The differences between the outcomes of the mTBI and control  
15 groups are shown in Table 3. The average baseline and 6-week BAI scores for mTBI group  
16 were 10.74 and 7.23, respectively. The BAI scores of the patients in the mTBI group  
17 significantly improved at 6 weeks post-injury. However, the mean BAI scores for the mTBI  
18 group for both the baseline and 6 week assessments were significantly different from those of  
19 the control group at the baseline assessment. The mean BDI scores of the mTBI group were  
20 9.8 and 7.99 at the baseline and 6-week assessments, respectively. The mean BDI score for  
21 mTBI group significantly decreased to **the value of** 1.81 at 6 weeks post-injury. The mean  
22 BDI score of the control group was 5.72. The mean BDI scores of the mTBI group were  
23 significantly different from those of the control group.

24  
25 No significant difference was observed between the baseline and 6-week ESS scores for  
26 the mTBI group. The mean daytime sleepiness score for the control group was 6.62, which  
27 was not significantly different from that of the mTBI group. The mean baseline PSQI score  
28 for the mTBI group was greater than 9, which was higher than the clinical cut-off point of 5.  
29 In addition, the mean PSQI score of mTBI at baseline assessment was higher than the mean  
30 score of 5.7 for the control group. The mean 6-week PSQI score for the mTBI group  
31 improved significantly to 6.4. The sleep quality of the mTBI group at 6 weeks post-injury  
32 was not significantly different from that of the control group. Because of the significant  
33 difference in mean age between the mTBI and control groups and the predominance of  
34 women in both groups, we performed **generalized linear regression analysis of the outcome**  
35 **measures with adjusting for age and sex** (Table 4). The differences in depression, anxiety,  
36 and sleep quality between the mTBI and control patients **kept significance after** adjusting for  
37 age or sex. However, sex was found to be a significant predictor of sleep quality, anxiety, and  
38 depression in the baseline and 6-week assessments. After adjusting for age and sex, the ESS  
39 score was significantly different between the control and mTBI groups at the baseline and  
40 6-week assessments, and age was determined to be a significant predictor of daytime  
41 sleepiness. In addition, the scores for all 4 outcome measures were higher among women than  
42 among men.



## DISCUSSION

Previous studies have shown that 85% of mTBI patients demonstrate improvement in psychiatric-related symptoms, whereas the remainder develop chronic psychosocial problems [14-16]. Often presenting with anxiety, depression, or sleep disturbances, TBI patients are at an increased risk of developing a psychiatric disorder within 3 months to 1 year post-injury [4]. It is unclear whether post-mTBI sleep disturbances are related to depression or anxiety. Thus, sleep disturbance may be a risk factor of subsequent depression. A meta-analysis of 21 studies demonstrated that insomnia patients have a 2-fold risk of developing depression [17]. The detailed course of post-mTBI depression, anxiety, and diminished sleep quality, especially during the early stages of recovery, have not been well characterized.

We examined the early stages of recovery from mTBI by using self-reported measures of depression, anxiety, sleep quality, and daytime sleepiness. **Most of them injured by transportation accident and falls. Other mechanism of injury included hit by something, and sport injury. There was no participant who injured by an industrial accident.** We determined that daytime sleepiness is not significantly affected by mTBI. Both the anxiety and depression symptoms in the mTBI group improved by the sixth week of recovery, but remained more severe than those of the control participants. However, sleep quality significantly improved within 6 weeks of experiencing mTBI, returning to a level that did not differ significantly from that of the control group. These results indicate that recovery from diminished sleep quality occurred more rapidly than did recovery from depression and anxiety.

Our prospective cohorts contained more women than men, and the mean ages of the mTBI and control groups differed significantly. Thus, we adjusted our analysis for effects of age and sex. The BAI, BDI, PSQI, and ESS scores were influenced by sex. However, our results demonstrated that the BAI, BDI, and PSQI scores were significantly affected by mTBI, whereas the ESS scores were not. We found the women in the mTBI group reported more severe symptoms for depression, anxiety, and diminished sleep quality at baseline. After 6 weeks of recovery, although the depression- and anxiety-related symptoms of both male and female mTBI patients improved, those of the female mTBI patients remained more severe than those of the male mTBI patients. Female mTBI patients also reported more severe symptoms related to diminished sleep quality and daytime sleepiness than did male mTBI patients.

Previous reports of the incidence of insomnia among post-acute TBI patients have ranged from 2% to 56% [18, 19]. Bryan found that sleep disturbance increases in patients who suffer repetitive TBI [20]. In our study, 90% of the mTBI patients and 44% of the control participants reported sleep disturbances. **The average score of PSQI in the control group (5.7) is higher than previously published values (2.7) [10], but it is close to the result of**

1  
2  
3 another study in Taiwan also by use of the Chinese PSQI study in healthy group (5.7) [13]. It  
4 may result from the different versions of questionnaire (English and Chinese) or other  
5 uncertain reasons. Our data showed that recovery from sleep disturbance occurred more  
6 rapidly among the mTBI patients than did recovery from post-injury depression and anxiety.  
7 There are 2 possible reasons for this finding. Sleep disturbance may be an independent  
8 symptom of mTBI that alters the circadian rhythm through injury-related changes in gene  
9 expression [21]. Alternatively, sleep disturbance may simply be a symptom of depression or  
10 anxiety that improves early during recovery [22].

11  
12  
13  
14  
15 Previous studies have demonstrated significant changes in anxiety- and  
16 depression-related symptoms between 1 week and 3 months following mTBI [23]. We  
17 observed improvement in the depression and anxiety assessment scores in our mTBI cohort at  
18 6 weeks post-injury. Nonetheless, the BDI and the BAI scores differed significantly between  
19 the mTBI and control groups at the 6 week post-injury assessment.

20  
21  
22 Depression and PTSD have been shown to be critical mediators of the recovery of  
23 physical health following mTBI [24]. Multiple studies have investigated the incidence of  
24 PTSD following TBI [25]. Psychiatric comorbidities have been associated with PTSD  
25 following TBI, and depression was shown to be a predictor of the post-TBI chronicity of  
26 PTSD [26, 27]. We did not explore the role of PTSD in recovery from depression, anxiety,  
27 and diminished sleep quality, but we speculate that PTSD is associated with all of these  
28 mental disorders in mTBI patients.

29  
30  
31  
32 Certain limitations to our findings should be considered. First, some of our mTBI  
33 patients may have used medications before or after suffering mTBI that may have influenced  
34 their assessment scores. Second, it is possible that some of our mTBI patients may have had  
35 unrelated diseases or pre-injury conditions that were not identified before or during their  
36 participation in our study. Third, we investigated only the subacute stages of depression,  
37 anxiety, and diminished sleep quality, rather than the chronic stages of these diseases. In  
38 addition, REM sleep plays an important role in mood disorders. The changes of REM sleep  
39 after mTBI are still controversial [28, 29]. This is certainly a major issue for study. However,  
40 sleep architecture was not measured in our study. Although long-term observational studies  
41 are required to confirm our findings, our results provide valuable information for  
42 understanding the development and recovery of mental disorders following mTBI.  
43  
44  
45  
46  
47  
48  
49  
50  
51  
52  
53  
54  
55  
56  
57  
58  
59  
60



**Table 1.** The demographic and clinical data of all mTBI patients initially enrolled in our study

|                            | Lost to follow up | Completed 6-wk follow up | <i>P</i> value |
|----------------------------|-------------------|--------------------------|----------------|
| Age (y)                    | 38.88             | 39.53                    | NS             |
| Male / Female (n)          | 56/94             | 35/65                    | NS             |
| Education (y)              | 15.04             | 15.46                    | NS             |
| Smoker (N/Y)               | 113 / 37          | 82 / 18                  | NS             |
| Drink alcohol (N/Y)        | 94/56             | 58/ 42                   | NS             |
| Headache (N/Y)             | 50/100            | 25/75                    | .02            |
| Depression (N/Y)           | 91 / 59           | 51 / 49                  | NS             |
| GCS                        | 14.80             | 14.98                    | NS             |
| <b>Mechanism of Injury</b> |                   |                          |                |
| Transportation accident    | 77                | 39                       | NS             |
| Falls                      | 40                | 34                       |                |
| Other                      | 33                | 27                       |                |
| BAI                        | 7.85              | 10.74                    | .03            |
| BDI                        | 8.19              | 9.80                     | NS             |
| ESS                        | 6.89              | 7.95                     | NS             |
| PSQI                       | 6.27              | 9.51                     | <.01           |

mTBI: mild traumatic brain injury; NS:  $P > .05$ ; GCS: Glasgow Coma Scale; BAI: Beck Anxiety Inventory; BDI: Beck Depression Inventory-II; ESS: Epworth Sleepiness Scale; PSQI: Pittsburgh Sleep Quality Index

**Table 2.** The demographic and clinical data of the mTBI patients and the control participants who completed the 6-week follow up

|                             | mTBI    | Control  | <i>P</i> value |
|-----------------------------|---------|----------|----------------|
| Sample size (n)             | 100     | 137      |                |
| Age (y)                     | 39.53   | 29.86    | <.001          |
| Male / Female (n)           | 35/65   | 47/90    | NS             |
| Education (y)               | 15.46   | 14.91    | .045           |
| Smoker (N/Y)                | 82/18   | 115/22   | NS             |
| Drink (N/Y)                 | 58/42   | 51/82    | <.01           |
| Headache (N/Y)              | 25/75   | 98/39    | <.01           |
| Depression (N/Y)            | 51 / 49 | 103/ 34  | <.01           |
| GCS                         | 14.98   | -        | -              |
| <b>Questionnaires</b>       |         |          |                |
| BAI>7 (N/Y)                 | 57 / 43 | 125 / 12 | <.01           |
| BDI>9 (N/Y)                 | 53 / 47 | 111 / 26 | <.01           |
| ESS>9 (N/Y)                 | 66 / 34 | 108 / 29 | <.01           |
| PSQI>5 (N/Y)                | 10 / 90 | 77 / 60  | <.01           |
| <b>Mechanisms of Injury</b> |         |          |                |
| Transportation accident     | 39      | -        | -              |
| Falls                       | 34      | -        | -              |
| Other                       | 27      | -        | -              |

mTBI: mild traumatic brain injury; NS:  $P > .05$ ; GCS: Glasgow Coma Scale; BAI: Beck Anxiety Inventory; BDI: Beck Depression Inventory-II; ESS: Epworth Sleepiness Scale; PSQI: Pittsburgh Sleep Quality Index

**Table 3.** Differences between control participants and mTBI patients at baseline and 6 weeks post-injury

|                                         | BAI   | BDI   | ESS  | PSQI  |
|-----------------------------------------|-------|-------|------|-------|
| mTBI Baseline vs Control                | 8.02* | 4.08* | 1.33 | 3.81* |
| mTBI 6 wk vs Control                    | 4.51* | 2.27* | 0.87 | 0.7   |
| mTBI Baseline vs mTBI 6 wk <sup>+</sup> | 3.51* | 1.81* | 0.46 | 3.11* |

mTBI: mild traumatic brain injury; BAI: Beck Anxiety Inventory; BDI: Beck Depression Inventory-II; ESS: Epworth Sleepiness Scale; PSQI: Pittsburgh Sleep Quality Index

\* $P < .05$

<sup>+</sup>paired  $t$  test

**Table 4.** Coefficients of generalized linear model between control participants and mTBI patients at baseline and 6 weeks post-injury

|       | Control vs mTBI (baseline) |        |         |        | Control vs mTBI (6-week) |        |         |        |
|-------|----------------------------|--------|---------|--------|--------------------------|--------|---------|--------|
|       | BAI                        | BDI    | ESS     | PSQI   | BAI                      | BDI    | ESS     | PSQI   |
| mTBI  | 1.4*                       | 0.567* | 0.245*  | 0.487* | 1.026*                   | 2.632* | 1.309*  | 0.557  |
| Age   | 0.0007                     | -0.003 | -0.007* | 0.003  | -0.001                   | -0.035 | -0.045* | 0.016  |
| Women | 0.437*                     | 0.056* | 0.137*  | 0.137* | 0.562*                   | 2.945* | 1.263*  | 1.170* |

mTBI: mild traumatic brain injury; BAI: Beck Anxiety Inventory; BDI: Beck Depression Inventory-II; ESS: Epworth Sleepiness Scale; PSQI: Pittsburgh Sleep Quality Index

\* $P < .05$

**Conflict of interest**

None declared.

**Acknowledgments**

This study was supported by grants from the National Science Council, Taiwan (NSC 98-2321-B-038-005-MY3, NSC 101-2321-B-038-005, DOH 101-TD-B-111-003).

**Data sharing**

There is no additional data available.

**Contributorship statement**

The six authors are justifiably credited with authorship, according to the authorship criteria.

In detail: Hon-Ping Ma

– conception, design and interpretation of data, drafting of the manuscript, final approval given; Ju-Chi Ou–analysis and interpretation of data, drafting of the manuscript, final approval given; Chun-Ting Yeh

– acquisition of data, final approval given; Dean Wu – final approval given; Shin-Han Tsai – final approval given; Wen-Ta Chiu – Conception, design, final approval given; Chaur-Jong Hu – Conception, design, analysis and interpretation of data, drafting of the manuscript, final approval given.

## References

- 1 Access Economics Pty Limited. The Economic Cost of Spinal Cord Injury and Traumatic Brain injury in Australia. Geelong, Victoria, Australia: Victorian Neurotrauma Initiative; 2009.
- 2 U.S. Department of Veterans Affairs. VA/DoD clinical practice guideline for management of concussion/mild traumatic brain injury. Washington, DC: U.S. Department of Defense; April 2009.  
[http://www.healthquality.va.gov/mtbi/concussion\\_mtbi\\_full\\_1\\_0.pdf](http://www.healthquality.va.gov/mtbi/concussion_mtbi_full_1_0.pdf). Assessed June, 18, 2013
- 3 McCrea M, Iverson GL, McAllister TW, et al. An integrated review of recovery after mild traumatic brain injury(MTBI): implications for clinical management. Clin Neuropsychol. 2009;**23**:1368-90
- 4 Bryant RA, O'Donnell M, Creamer M, et al. The psychiatric sequelae of traumatic injury. Am J Psychiatry 2010 ;**167** :312-320
- 5 O'Donnell ML, Creamer M, Bryant RA, et al. Posttraumatic disorders following injury: an empirical and methodological review. Clin Psychol Rev 2003;**23**:587-603
- 6 Orff H, Ayalon L, Drummond S. Traumatic brain injury and sleep disturbance: a review of current research. J Head Trauma Rehabil 2009;**24**:155-65
- 7 Beck AT, Epstein N, Brown G, et al. An inventory for measuring clinical anxiety: Psychometric properties. J Consult Clin Psychol 1988; **56**:893-7
- 8 Beck AT, Steer RA, Brown GK. Manual for the Beck Depression Inventory-II. San Antonio, TX: Psychological Corporation; 1996
- 9 John MW. A new method for measuring daytime sleepiness: the Epworth Sleepiness Scale. Sleep 1991; **14**:540-5

- 1  
2  
3  
4 10 Buysse DJ, Reynolds CF, Monk TH, et al. The Pittsburgh Sleep Quality index: a new instrument for  
5  
6  
7 psychiatric practice and research. *Psychiatry Research*. 1989;**28**:193-213  
8  
9  
10 11 Zheng YP, Wei LA, Goa LG, et al. Applicability of the Chinese Beck Depression Inventory. *Compr*  
11  
12 *Psychiatry*. 1988;**29**:484-9  
13  
14 12 Chen NH, Johns MW, Li HY, et al. Validatio of a Chinese version of the Epworth Sleepiness Scale. *Qual life*  
15  
16 *Res*. 2002;**11**:817-21  
17  
18  
19 13 Tsai PS, Wang SY, Wang MY, et al. Psychometric evaluation of the Chinese version of the Pittsburgh Sleep  
20  
21 *Quality index in primary insomnia and control subjects*. *Qual Life Res*. 2005 **14**; 1943-52  
22  
23  
24 14 Ruff R. Two decades of advances in understanding of mild traumatic brain injury. *J Head Trauma Rehabil*  
25  
26 *2005; 20*:5-18  
27  
28  
29 15 Wood RL. Understanding the ‘miserable minority’: A diathesis-stress paradigm for postconcussional  
30  
31 *syndrome*. *Brain Injury* 2004;**18**:1135-1153  
32  
33  
34 16 Bazarian J, McClung J, Shah M, et al. Mild traumatic brain injury in the US 1998-2000. *Brain Injury*  
35  
36 *2005;19*:85-91  
37  
38  
39 17 Baglioni C, Battagliese G, Feige B, et al. Insomnia as a predictor of depression: a meta-analytic evaluation of  
40  
41 *longitudinal epidemiological studies*. *J Affect Disord* 2011;**135**:10-19  
42  
43  
44 18 Rutherford WH, Merrett JD, McDonald JR. Symptoms at one year following concussion from minor head  
45  
46 *injuries*. *Injury* 1977; **1**:1-4  
47  
48  
49 19 Beetar JT, Guilmette TJ, Sparadeo FR. Sleep and pain complaints in symptomatic traumatic brain injury and  
50  
51  
52  
53  
54  
55  
56  
57  
58  
59  
60

- 1  
2  
3  
4 neurologic populations. Archives of Physical Medicine and Rehabilitation 1996;77:1298-1302  
5  
6  
7 20 Bryan CJ. Repetitive Traumatic Brain injury (or Concussion) Increases Severity of Sleep Disturbance among  
8  
9 Deployed Military Personnel. Sleep 2013;1;36:941-6  
10  
11  
12 21 Palagini L, Biber K, Riemann D. The genetics of insomnia – evidence for epigenetic mechanisms? Sleep  
13  
14 Med Rev. 2013;1-11  
15  
16  
17  
18 22 Breslau N, Roth T, Rosenthal L, Andreski P. Sleep disturbance and psychiatric disorders: a longitudinal  
19  
20 epidemiological study of young adults. Biol Psychiatry 1996;30:411-8  
21  
22  
23  
24 23 Ponsford J, Cameron P, Fitzgerald M, et al. Long-term outcomes after uncomplicated mild traumatic brain  
25  
26 injury: a comparison with trauma controls. J Neurotrauma 2011;28:937-46  
27  
28  
29  
30 24 Hoge CW, McGurk D, Thomas, et al. Mild traumatic brain injury in U.S. Soldiers returning from Iraq. N  
31  
32 Engl J Med 2008;358:453-63  
33  
34  
35  
36 25 O'Donnell ML, Creamer M, Pattison P, et al. Psychiatric morbidity following injury. Am J Psychiatry 2004;  
37  
38 161:507-14  
39  
40  
41  
42 26 Shalev AY, Freedman S, Peri T, et al. Prospective study of posttraumatic stress disorder and depression  
43  
44 following trauma. Am J Psychiatry 1998;155:630-7  
45  
46  
47  
48 27 McFarlane AC, Papay P, Multiple diagnoses in posttraumatic stress disorder in the victims of a natural  
49  
50 disaster. J Nerv Ment Dis 1992;180:498-504  
51  
52 28 Gosselin N, Lassonde M, Petit D, et al. Sleep following sport-related concussions. Sleep Med 2009;10 :35-46  
53  
54 29 Shekleton JA, Parcell DL, Redman JR, et al. Sleep disturbance and melatonin levels following traumatic  
55  
56 brain injury. Neurology 2010;74: 1732-8  
57  
58  
59  
60

1  
2  
3  
4  
5  
6  
7  
8  
9  
10  
11  
12  
13  
14  
15  
16  
17  
18  
19  
20  
21  
22  
23  
24  
25  
26  
27  
28  
29  
30  
31  
32  
33  
34  
35  
36  
37  
38  
39  
40  
41  
42  
43  
44  
45  
46  
47  
48  
49  
50  
51  
52  
53  
54  
55  
56  
57  
58  
59  
60

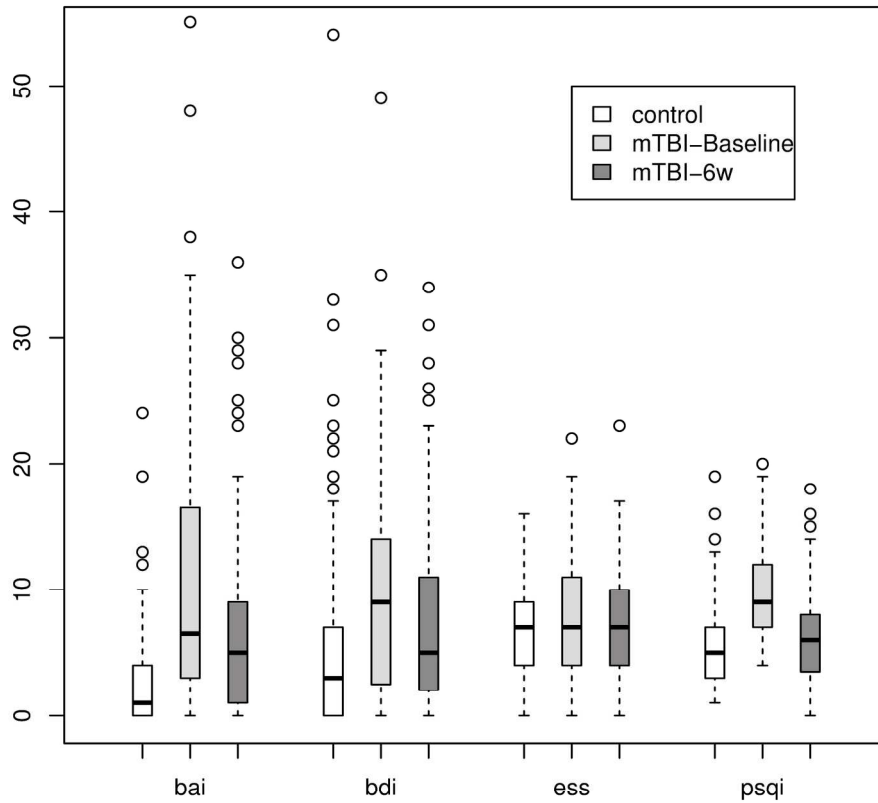

Figure 1. Box plot of the baseline and 6-wk post-injury assessments of the clinical outcomes. White bars represent the data for the control group. Light gray and dark gray bars represent the mild traumatic brain injury (mTBI) patients at baseline and 6 weeks post-injury, respectively. From left to right, the data for the Beck Anxiety Inventory (BAI), the Beck Depression Inventory-II (BDI), the Epworth Sleepiness Scale (ESS), and the Pittsburgh Sleep Quality Index (PSQI) scores are represented.  
177x177mm (300 x 300 DPI)



## STROBE Statement—checklist of items that should be included in reports of observational studies

|                              | Item No | Recommendation                                                                                                                                                                                                                                                                                                                                  |
|------------------------------|---------|-------------------------------------------------------------------------------------------------------------------------------------------------------------------------------------------------------------------------------------------------------------------------------------------------------------------------------------------------|
| <b>Title and abstract</b>    | 1       | (a) Indicate the study's design with a commonly used term in the title or the abstract<br>Page 2 – observational study<br>(b) Provide in the abstract an informative and balanced summary of what was done and what was found<br>Page 2 – results and conclusions                                                                               |
| <b>Introduction</b>          |         |                                                                                                                                                                                                                                                                                                                                                 |
| Background/rationale         | 2       | Explain the scientific background and rationale for the investigation being reported<br>Page 3                                                                                                                                                                                                                                                  |
| Objectives                   | 3       | State specific objectives, including any prespecified hypotheses<br>Page 3                                                                                                                                                                                                                                                                      |
| <b>Methods</b>               |         |                                                                                                                                                                                                                                                                                                                                                 |
| Study design                 | 4       | Present key elements of study design early in the paper<br>Page 3                                                                                                                                                                                                                                                                               |
| Setting                      | 5       | Describe the setting, locations, and relevant dates, including periods of recruitment, exposure, follow-up, and data collection<br>Page 3                                                                                                                                                                                                       |
| Participants                 | 6       | (a) <i>Case-control study</i> —Give the eligibility criteria, and the sources and methods of case ascertainment and control selection. Give the rationale for the choice of cases and controls<br>Page 3<br>(b) <i>Case-control study</i> —For matched studies, give matching criteria and the number of controls per case<br>Not matched study |
| Variables                    | 7       | Clearly define all outcomes, exposures, predictors, potential confounders, and effect modifiers. Give diagnostic criteria, if applicable<br>Page 3 & 4                                                                                                                                                                                          |
| Data sources/<br>measurement | 8*      | For each variable of interest, give sources of data and details of methods of assessment (measurement). Describe comparability of assessment methods if there is more than one group<br>Page 4                                                                                                                                                  |
| Bias                         | 9       | Describe any efforts to address potential sources of bias                                                                                                                                                                                                                                                                                       |
| Study size                   | 10      | Explain how the study size was arrived at                                                                                                                                                                                                                                                                                                       |
| Quantitative variables       | 11      | Explain how quantitative variables were handled in the analyses. If applicable, describe which groupings were chosen and why<br>Page 4                                                                                                                                                                                                          |
| Statistical methods          | 12      | (a) Describe all statistical methods, including those used to control for confounding<br>Page 4<br>(b) Describe any methods used to examine subgroups and interactions<br>(c) Explain how missing data were addressed                                                                                                                           |

|  |  |                                                                                                              |
|--|--|--------------------------------------------------------------------------------------------------------------|
|  |  | (d) <i>Cohort study</i> —If applicable, explain how loss to follow-up was addressed                          |
|  |  | <i>Case-control study</i> —If applicable, explain how matching of cases and controls was addressed           |
|  |  | <i>Cross-sectional study</i> —If applicable, describe analytical methods taking account of sampling strategy |
|  |  | Not applicable                                                                                               |
|  |  | (e) Describe any sensitivity analyses                                                                        |
|  |  | Not applicable                                                                                               |

## Results

|                   |     |                                                                                                                                                                                                                                                                                                                                                                                                                         |
|-------------------|-----|-------------------------------------------------------------------------------------------------------------------------------------------------------------------------------------------------------------------------------------------------------------------------------------------------------------------------------------------------------------------------------------------------------------------------|
| Participants      | 13* | (a) Report numbers of individuals at each stage of study—eg numbers potentially eligible, examined for eligibility, confirmed eligible, included in the study, completing follow-up, and analysed<br>Page 4<br>(b) Give reasons for non-participation at each stage<br>(c) Consider use of a flow diagram                                                                                                               |
| Descriptive data  | 14* | (a) Give characteristics of study participants (eg demographic, clinical, social) and information on exposures and potential confounders<br>Page 4 & 5, table 2<br>(b) Indicate number of participants with missing data for each variable of interest<br>(c) <i>Cohort study</i> —Summarise follow-up time (eg, average and total amount)<br>Not applicable                                                            |
| Outcome data      | 15* | <i>Cohort study</i> —Report numbers of outcome events or summary measures over time<br><i>Case-control study</i> —Report numbers in each exposure category, or summary measures of exposure<br>Page 4 & 5<br><i>Cross-sectional study</i> —Report numbers of outcome events or summary measures                                                                                                                         |
| Main results      | 16  | (a) Give unadjusted estimates and, if applicable, confounder-adjusted estimates and their precision (eg, 95% confidence interval). Make clear which confounders were adjusted for and why they were included<br>Page 5<br>(b) Report category boundaries when continuous variables were categorized<br>(c) If relevant, consider translating estimates of relative risk into absolute risk for a meaningful time period |
| Other analyses    | 17  | Report other analyses done—eg analyses of subgroups and interactions, and sensitivity analyses<br>Not applicable                                                                                                                                                                                                                                                                                                        |
| <b>Discussion</b> |     |                                                                                                                                                                                                                                                                                                                                                                                                                         |
| Key results       | 18  | Summarise key results with reference to study objectives<br>Page 6                                                                                                                                                                                                                                                                                                                                                      |

|    |                          |    |                                                                                                     |
|----|--------------------------|----|-----------------------------------------------------------------------------------------------------|
| 1  |                          |    |                                                                                                     |
| 2  | Limitations              | 19 | Discuss limitations of the study, taking into account sources of potential bias or imprecision.     |
| 3  |                          |    | Discuss both direction and magnitude of any potential bias                                          |
| 4  |                          |    | Page 6                                                                                              |
| 5  | Interpretation           | 20 | Give a cautious overall interpretation of results considering objectives, limitations, multiplicity |
| 6  |                          |    | of analyses, results from similar studies, and other relevant evidence                              |
| 7  |                          |    | Page 6 & 7                                                                                          |
| 8  | Generalisability         | 21 | Discuss the generalisability (external validity) of the study results                               |
| 9  |                          |    | Page 6 & 7                                                                                          |
| 10 |                          |    |                                                                                                     |
| 11 | <b>Other information</b> |    |                                                                                                     |
| 12 | Funding                  | 22 | Give the source of funding and the role of the funders for the present study and, if applicable,    |
| 13 |                          |    | for the original study on which the present article is based                                        |
| 14 |                          |    | Page 11                                                                                             |
| 15 |                          |    |                                                                                                     |
| 16 |                          |    |                                                                                                     |

17  
18 \*Give information separately for cases and controls in case-control studies and, if applicable, for exposed and  
19 unexposed groups in cohort and cross-sectional studies.  
20

21  
22 **Note:** An Explanation and Elaboration article discusses each checklist item and gives methodological background and  
23 published examples of transparent reporting. The STROBE checklist is best used in conjunction with this article (freely  
24 available on the Web sites of PLoS Medicine at <http://www.plosmedicine.org/>, Annals of Internal Medicine at  
25 <http://www.annals.org/>, and Epidemiology at <http://www.epidem.com/>). Information on the STROBE Initiative is  
26 available at [www.strobe-statement.org](http://www.strobe-statement.org).  
27  
28  
29  
30  
31  
32  
33  
34  
35  
36  
37  
38  
39  
40  
41  
42  
43  
44  
45  
46  
47  
48  
49  
50  
51  
52  
53  
54  
55  
56  
57  
58  
59  
60



**Recovery from Sleep Disturbance Precedes that of Depression and Anxiety Following Mild Traumatic Brain Injury: A Six-Week Follow-up Study**

|                                 |                                                                                                                                                                                                                                                                                                                                                                                                                                                                                                                                 |
|---------------------------------|---------------------------------------------------------------------------------------------------------------------------------------------------------------------------------------------------------------------------------------------------------------------------------------------------------------------------------------------------------------------------------------------------------------------------------------------------------------------------------------------------------------------------------|
| Journal:                        | <i>BMJ Open</i>                                                                                                                                                                                                                                                                                                                                                                                                                                                                                                                 |
| Manuscript ID:                  | bmjopen-2013-004205.R2                                                                                                                                                                                                                                                                                                                                                                                                                                                                                                          |
| Article Type:                   | Research                                                                                                                                                                                                                                                                                                                                                                                                                                                                                                                        |
| Date Submitted by the Author:   | 03-Dec-2013                                                                                                                                                                                                                                                                                                                                                                                                                                                                                                                     |
| Complete List of Authors:       | Ma, Hon-Ping; Shuang Ho Hospital, Taipei Medical University, Emergency medicine<br>Ou, Ju-Chi; Shuang Ho Hospital, Taipei medical university, Emergency<br>Yeh, Chun-Ting; Shuang Ho Hospital, Taipei Medical University, Emergency medicine<br>Wu, Dean; Shuang Ho Hospital, Neurology and Sleep Center<br>Tsai, Shin-Han; Shuang Ho Hospital, Taipei medical university, Emergency<br>Chiu, Wen-Ta; Ministry of Health and Welfare,<br>Hu, Chaur-Jong; Shuang Ho Hospital, Taipei Medical University, Department of Neurology |
| <b>Primary Subject Heading</b>: | Neurology                                                                                                                                                                                                                                                                                                                                                                                                                                                                                                                       |
| Secondary Subject Heading:      | Mental health                                                                                                                                                                                                                                                                                                                                                                                                                                                                                                                   |
| Keywords:                       | Depression & mood disorders < PSYCHIATRY, Anxiety disorders < PSYCHIATRY, CLINICAL PHYSIOLOGY                                                                                                                                                                                                                                                                                                                                                                                                                                   |
|                                 |                                                                                                                                                                                                                                                                                                                                                                                                                                                                                                                                 |

SCHOLARONE™  
Manuscripts

## Recovery from Sleep Disturbance Precedes that of Depression and Anxiety Following Mild Traumatic Brain Injury: A Six-Week Follow-up Study

Hon-Ping Ma<sup>1,2</sup>; Ju-Chi Ou<sup>1</sup>; Chun-Ting Yeh<sup>1,2</sup>; Dean Wu<sup>3</sup>; Shin-Han Tsai<sup>1,2,4</sup>; Wen-Ta Chiu<sup>5</sup>; Chaur-Jong Hu<sup>3,6,7</sup>

<sup>1</sup> Department of Emergency medicine, Shuang Ho Hospital, Taipei Medical University, New Taipei City, Taiwan

<sup>2</sup> Department of Emergency medicine, School of Medicine, Taipei Medical University, Taipei, Taiwan

<sup>3</sup> Department of Neurology and Sleep Center, Shuang Ho Hospital, Taipei Medical University, New Taipei City, Taiwan

<sup>4</sup> Graduate Institute of Injury Prevention and Control, College of Public Health and Nutrition, Taipei Medical University, Taipei, Taiwan

<sup>5</sup> Ministry of Health and Welfare, Taiwan, ROC

<sup>6</sup> Department of Neurology, School of Medicine, Taipei Medical University, Taipei, Taiwan

<sup>7</sup> Department of Neurology, National Defense medical center, Taipei, Taiwan

\*Corresponding author: Chaur-Jong Hu

291, Zhongzheng Rd, Zhonghe District, New Taipei City, 23561, Taiwan

Email: [chaurjongh@s.tmu.edu.tw](mailto:chaurjongh@s.tmu.edu.tw) ; phone: 886-2-2249-0088

Keywords: mild traumatic brain injury, depression, sleep problem, anxiety

Word count: 2283

Number of reference: 29

## ABSTRACT

**Introduction:** Previous studies of recovery after mild traumatic brain injury (mTBI) have focused on chronic mental disorders. The detailed course of these disorders at the acute and subacute stages, especially with regard to recovery from sleep disturbances, has not been well characterized. The aim of our study was to determine the course of mental disorders, including depression, anxiety, and sleep disturbance, following mTBI.

**Methods:** We recruited 250 mTBI patients and 100 healthy participants (control group) for our observational study between January 2011 to July 2012. The mTBI and control participants were assessed at baseline and 6 weeks after mTBI using the Beck Anxiety Inventory (BAI), the Beck Depression Inventory II (BDI), the Epworth Sleepiness Scale (ESS), and the Pittsburgh Sleep Quality Index (PSQI).

**Results:** The ESS scores were not significantly different between the 2 groups at baseline or at 6 weeks after mTBI. Although the BAI, BDI, and PSQI scores of the mTBI group were significantly different than those of the control group at baseline, all had improved significantly 6 weeks later. However, only the PSQI score improved to a level that was not significantly different from that of the control group.

**Conclusions:** Daytime sleepiness is not affected by mTBI. However, mTBI causes depression and anxiety and diminished sleep quality. Although all these conditions improve significantly within 6 weeks post-mTBI, only sleep quality improves to a pre-mTBI level. Thus, recovery from mTBI-induced sleep disturbance occurs more rapidly than that of mTBI-induced depression and anxiety.

### Article summary

- 100 mTBI patients and the 137 control participants who completed the questionnaires.
- The number of women is more than the number of men that joined our study
- Sleep disturbance, depression, anxiety improved after 6 weeks post-injury.
- Recovery from sleep disturbance occurred more rapidly

### Strengths and limitations of this study

Previous reports of the incidence of insomnia among post-acute TBI patients have ranged from 2% to 56%. In our study, 90% of the mTBI patients and 44% of the control participants reported sleep disturbances. Our data showed that recovery from sleep disturbance occurred more rapidly among the mTBI patients than did recovery from post-injury depression and anxiety. Previous studies have demonstrated significant changes in anxiety- and depression-related symptoms between 1 week and 3 months following mTBI. We observed improvement in the depression and anxiety assessment scores in our mTBI cohort at 6 weeks post-injury. Nonetheless, the BDI and the BAI scores differed significantly between the mTBI and control groups at the 6 week post-injury assessment.

Some of our mTBI patients may have used medications before or after suffering mTBI that may have influenced their assessment scores. It is also possible that some of our mTBI patients may have had unrelated diseases or pre-injury conditions that were not identified before or during their participation in our study. In addition, we investigated only the subacute stages of depression, anxiety, and diminished sleep quality, rather than the chronic stages of these diseases.

## INTRODUCTION

Traumatic brain injury (TBI) and mild traumatic brain injury (mTBI) are major public health problems. Studies in Australia have estimated lifetime costs of over \$2.5 million per TBI survivor [1]. Headache, blurred vision, fatigue, and sleep disturbance are the most common physical symptoms following brain injury [2]. Previous studies have reported that the symptom scores following mTBI were equal to that of control patients within 7 days post-injury [3].

However, increasing evidence suggests that the risk of developing a psychiatric disorder increases following mTBI [4]. Although multiple studies have investigated post-traumatic stress disorder (PTSD), the risk of other disorders, such as depression, have also been found to increase following mTBI [5]. The most common psychiatric disorders during the first 12 months following injury are depression, anxiety disorder, and agoraphobia [4].

Diminished sleep quality is one of the most commonly reported symptoms following mTBI [6], and depression and anxiety are also prevalent. However, these conditions are often under-reported, and may become chronic in the absence of treatment. The objectives of our study were to characterize the course of post-mTBI depression, anxiety, and diminished sleep quality during a 6-week follow up, and to compare the baseline and 6-week clinical assessments of mTBI patients with those of healthy participants.

## METHODS

### Participants and Study Design

Our prospective study was approved by the Joint Institutional Review Board of Taipei Medical University. Eligible patients aged  $\geq 20$  years who were treated in an emergency room within 24 hours after closed head trauma were recruited from 3 hospitals in Taiwan between January 2011 and July 2012. The definition of mTBI was based on the diagnostic criteria established by the American Congress of Rehabilitation Medicine, which consist of a Glasgow Coma Scale (GCS) score of 13 to 15 at presentation and loss of consciousness for  $< 30$  min. Patients with a history of cerebrovascular disease, mental retardation, previous TBI, epilepsy, or severe systemic medical illness were excluded from our study. The inclusion of the healthy control participants were no brain injury history and older than 20 years old.

Patients were initially contacted by phone. A total of 607 mTBI patients were recruited for our study, among whom 250 (41.19%) provided informed consent, and completed a baseline assessment during an initial evaluation within 1 month after experiencing an mTBI. Six weeks after completing the baseline assessment, 100 (40%) of the mTBI patients completed the final assessment. The baseline and 6-week assessments consisted of 4 investigator-administered questionnaires, namely, the Beck Anxiety Inventory (BAI) [7], the Beck Depression Inventory-II (BDI) [8], the Epworth Sleepiness Scale (ESS) [9], and the Pittsburgh Sleep Quality Index (PSQI) [10].



## Outcome Measures

The patients' demographic information, injury-related data, and smoking and drinking history were recorded at the baseline evaluation. Chinese versions of the BDI, the BAI, the ESS, and the PSQI were used in our study [11-13]. Depression was assessed using the BDI, which scored the patient's selection of 1 of 4 possible responses to 21 multiple-choice items on a scale of 0 to 3 based on their response. The severity of anxiety symptoms was assessed using the BAI, which also scored the patient's selection of 1 of 4 possible responses to 21 multiple-choice items on a scale of 0 to 3 based on their response. A high score on the BAI indicates a high level of anxiety. Daytime sleepiness was subjectively assessed using the ESS, which asked the patient to rate their risk of falling asleep on a 4-point Likert scale (0-3) in 8 different situations. Overall sleep quality was assessed using the PSQI, which evaluated 7 aspects of sleep quality. A high overall score on the PSQI indicates poor sleep quality.

## Statistical methods

Associations between the categorical variables were evaluated using a chi-squared analysis, and the Fisher exact test was used when at least one of the values was  $<5$ . Associations between the normally distributed continuous variables were evaluated using  $t$  tests, and the Mann-Whitney U test was used to evaluate the continuous variables with an asymmetrical distribution. Paired  $t$  tests and a paired Mann-Whitney U test were used to evaluate the intragroup differences between the baseline and 6-week assessments for normally and asymmetrically distributed data, respectively. In this study, all outcome were abnormally distributed thus the non-parametric method was used. In addition, Generalized linear regression analyses were conducted for outcomes with or without adjustment for age and sex. All the statistical analyses were performed using the R statistical software, version 3.0.1 for Windows (R Foundation for Statistical Computing, Vienna, Austria). The level of statistical significance was set at  $P < .05$ .

## RESULTS

The demographic information and clinical data of all the mTBI and control participants who were initially enrolled in the study are shown in Table 1. Six weeks following their baseline assessment, 150 patients could not be contacted, or declined to participate further in our study. The age; sex; education level; smoking status; alcohol use; proportion reporting depression; mechanism of injury; and GCS, BDI, ESS scores of patients who completed the study did not differ significantly from those of patients who did not complete the study. The patients who did not complete the study had lower mean scores for the BAI and the PSQI than the patients who completed the study.

The demographic information and clinical data of the 100 mTBI patients and the 137 control

1  
2  
3 participants who completed the study are shown in Table 2. The mean age of the mTBI group  
4 was significantly higher than the mean age of the control group. The proportions reporting  
5 alcohol use, headache, and depression were significantly different between the mTBI and  
6 control groups. The percentages of mTBI patients who reported headache or depression were  
7 higher than those of the control group. Transportation accidents and falls caused 39% and  
8 34% of the mTBI cases, respectively. Considering the clinical cut-off for each questionnaire,  
9 most control patients did not have depression, anxiety, daytime sleepiness, or diminished  
10 sleep quality, whereas most of mTBI patients had high PSQI scores.

11  
12 The mean scores of the 4 outcome measures are shown in Figure 1. The average scores  
13 for the mTBI patients at baseline were the highest. After 6 weeks, the average scores for the  
14 mTBI patients decreased. The differences between the outcomes of the mTBI and control  
15 groups are shown in Table 3. The average baseline and 6-week BAI scores for mTBI group  
16 were 10.74 and 7.23, respectively. The BAI scores of the patients in the mTBI group  
17 significantly improved at 6 weeks post-injury. However, the mean BAI scores for the mTBI  
18 group for both the baseline and 6 week assessments were significantly different from those of  
19 the control group at the baseline assessment. The mean BDI scores of the mTBI group were  
20 9.8 and 7.99 at the baseline and 6-week assessments, respectively. The mean BDI score for  
21 mTBI group significantly decreased to the value of 1.81 at 6 weeks post-injury. The mean  
22 BDI score of the control group was 5.72. The mean BDI scores of the mTBI group were  
23 significantly different from those of the control group.

24  
25 No significant difference was observed between the baseline and 6-week ESS scores for  
26 the mTBI group. The mean daytime sleepiness score for the control group was 6.62, which  
27 was not significantly different from that of the mTBI group. The mean baseline PSQI score  
28 for the mTBI group was greater than 9, which was higher than the clinical cut-off point of 5.  
29 In addition, the mean PSQI score of mTBI at baseline assessment was higher than the mean  
30 score of 5.7 for the control group. The mean 6-week PSQI score for the mTBI group  
31 improved significantly to 6.4. The sleep quality of the mTBI group at 6 weeks post-injury  
32 was not significantly different from that of the control group. Because of the significant  
33 difference in mean age between the mTBI and control groups and the predominance of  
34 women in both groups, we performed generalized linear regression analysis of the outcome  
35 measures with adjusting for age and sex (Table 4). The differences in depression, anxiety,  
36 and sleep quality between the mTBI and control patients kept significance after adjusting for  
37 age or sex. However, sex was found to be a significant predictor of sleep quality, anxiety, and  
38 depression in the baseline and 6-week assessments. After adjusting for age and sex, the ESS  
39 score was significantly different between the control and mTBI groups at the baseline and  
40 6-week assessments, and age was determined to be a significant predictor of daytime  
41 sleepiness. In addition, the scores for all 4 outcome measures were higher among women than  
42 among men.

## DISCUSSION

Previous studies have shown that 85% of mTBI patients demonstrate improvement in psychiatric-related symptoms, whereas the remainder develop chronic psychosocial problems [14-16]. Often presenting with anxiety, depression, or sleep disturbances, TBI patients are at an increased risk of developing a psychiatric disorder within 3 months to 1 year post-injury [4]. It is unclear whether post-mTBI sleep disturbances are related to depression or anxiety. Thus, sleep disturbance may be a risk factor of subsequent depression. A meta-analysis of 21 studies demonstrated that insomnia patients have a 2-fold risk of developing depression [17]. The detailed course of post-mTBI depression, anxiety, and diminished sleep quality, especially during the early stages of recovery, have not been well characterized.

We examined the early stages of recovery from mTBI by using self-reported measures of depression, anxiety, sleep quality, and daytime sleepiness. Most of them injured by transportation accident and falls. Other mechanism of injury included hit by something, and sport injury. There was no participant who injured by an industrial accident. We determined that daytime sleepiness is not significantly affected by mTBI. Both the anxiety and depression symptoms in the mTBI group improved by the sixth week of recovery, but remained more severe than those of the control participants. However, sleep quality significantly improved within 6 weeks of experiencing mTBI, returning to a level that did not differ significantly from that of the control group. These results indicate that recovery from diminished sleep quality occurred more rapidly than did recovery from depression and anxiety.

Our prospective cohorts contained more women than men, and the mean ages of the mTBI and control groups differed significantly. Thus, we adjusted our analysis for effects of age and sex. The BAI, BDI, PSQI, and ESS scores were influenced by sex. However, our results demonstrated that the BAI, BDI, and PSQI scores were significantly affected by mTBI, whereas the ESS scores were not. We found the women in the mTBI group reported more severe symptoms for depression, anxiety, and diminished sleep quality at baseline. After 6 weeks of recovery, although the depression- and anxiety-related symptoms of both male and female mTBI patients improved, those of the female mTBI patients remained more severe than those of the male mTBI patients. Female mTBI patients also reported more severe symptoms related to diminished sleep quality and daytime sleepiness than did male mTBI patients.

Previous reports of the incidence of insomnia among post-acute TBI patients have ranged from 2% to 56% [18, 19]. Bryan found that sleep disturbance increases in patients who suffer repetitive TBI [20]. In our study, 90% of the mTBI patients and 44% of the control participants reported sleep disturbances. The average score of PSQI in the control group (5.7) is higher than previously published values (2.7) [10], but it is close to the result of

1  
2  
3 another study in Taiwan also by use of the Chinese PSQI study in healthy group (5.7) [13]. It  
4 may result from the different versions of questionnaire (English and Chinese) or other  
5 uncertain reasons. Our data showed that recovery from sleep disturbance occurred more  
6 rapidly among the mTBI patients than did recovery from post-injury depression and anxiety.  
7 There are 2 possible reasons for this finding. Sleep disturbance may be an independent  
8 symptom of mTBI that alters the circadian rhythm through injury-related changes in gene  
9 expression [21]. Alternatively, sleep disturbance may simply be a symptom of depression or  
10 anxiety that improves early during recovery [22].

11  
12  
13  
14  
15 Previous studies have demonstrated significant changes in anxiety- and  
16 depression-related symptoms between 1 week and 3 months following mTBI [23]. We  
17 observed improvement in the depression and anxiety assessment scores in our mTBI cohort at  
18 6 weeks post-injury. Nonetheless, the BDI and the BAI scores differed significantly between  
19 the mTBI and control groups at the 6 week post-injury assessment.

20  
21  
22 Depression and PTSD have been shown to be critical mediators of the recovery of  
23 physical health following mTBI [24]. Multiple studies have investigated the incidence of  
24 PTSD following TBI [25]. Psychiatric comorbidities have been associated with PTSD  
25 following TBI, and depression was shown to be a predictor of the post-TBI chronicity of  
26 PTSD [26, 27]. We did not explore the role of PTSD in recovery from depression, anxiety,  
27 and diminished sleep quality, but we speculate that PTSD is associated with all of these  
28 mental disorders in mTBI patients.

29  
30  
31  
32 Certain limitations to our findings should be considered. First, some of our mTBI  
33 patients may have used medications before or after suffering mTBI that may have influenced  
34 their assessment scores. Second, it is possible that some of our mTBI patients may have had  
35 unrelated diseases or pre-injury conditions that were not identified before or during their  
36 participation in our study. Third, we investigated only the subacute stages of depression,  
37 anxiety, and diminished sleep quality, rather than the chronic stages of these diseases. In  
38 addition, REM sleep plays an important role in mood disorders. The changes of REM sleep  
39 after mTBI are still controversial[28, 29]. This is certainly a major issue for study. However,  
40 sleep architecture was not measured in our study. Although long-term observational studies  
41 are required to confirm our findings, our results provide valuable information for  
42 understanding the development and recovery of mental disorders following mTBI.  
43  
44  
45  
46  
47  
48  
49  
50  
51  
52  
53  
54  
55  
56  
57  
58  
59  
60

**Table 1.** The demographic and clinical data of all mTBI patients initially enrolled in our study

|                            | Lost to follow up | Completed 6-wk follow up | <i>P</i> value |
|----------------------------|-------------------|--------------------------|----------------|
| Age (y)                    | 38.88             | 39.53                    | NS             |
| Male / Female (n)          | 56/94             | 35/65                    | NS             |
| Education (y)              | 15.04             | 15.46                    | NS             |
| Smoker (N/Y)               | 113 / 37          | 82 / 18                  | NS             |
| Drink alcohol (N/Y)        | 94/56             | 58/ 42                   | NS             |
| Headache (N/Y)             | 50/100            | 25/75                    | .02            |
| Depression (N/Y)           | 91 / 59           | 51 / 49                  | NS             |
| GCS                        | 14.80             | 14.98                    | NS             |
| <b>Mechanism of Injury</b> |                   |                          |                |
| Transportation accident    | 77                | 39                       | NS             |
| Falls                      | 40                | 34                       |                |
| Other                      | 33                | 27                       |                |
| BAI                        | 7.85              | 10.74                    | .03            |
| BDI                        | 8.19              | 9.80                     | NS             |
| ESS                        | 6.89              | 7.95                     | NS             |
| PSQI                       | 6.27              | 9.51                     | <.01           |

mTBI: mild traumatic brain injury; NS:  $P > .05$ ; GCS: Glasgow Coma Scale; BAI: Beck Anxiety Inventory; BDI: Beck Depression Inventory-II; ESS: Epworth Sleepiness Scale; PSQI: Pittsburgh Sleep Quality Index

**Table 2.** The demographic and clinical data of the mTBI patients and the control participants who completed the 6-week follow up

|                             | mTBI    | Control  | <i>P</i> value |
|-----------------------------|---------|----------|----------------|
| Sample size (n)             | 100     | 137      |                |
| Age (y)                     | 39.53   | 29.86    | <.001          |
| Male / Female (n)           | 35/65   | 47/90    | NS             |
| Education (y)               | 15.46   | 14.91    | .045           |
| Smoker (N/Y)                | 82/18   | 115/22   | NS             |
| Drink (N/Y)                 | 58/42   | 51/82    | <.01           |
| Headache (N/Y)              | 25/75   | 98/39    | <.01           |
| Depression (N/Y)            | 51 / 49 | 103/ 34  | <.01           |
| GCS                         | 14.98   | -        | -              |
| <b>Questionnaires</b>       |         |          |                |
| BAI >7 (N/Y)                | 57 / 43 | 125 / 12 | <.01           |
| BDI >9 (N/Y)                | 53 / 47 | 111 / 26 | <.01           |
| ESS >9 (N/Y)                | 66 / 34 | 108 / 29 | <.01           |
| PSQI >5 (N/Y)               | 10 / 90 | 77 / 60  | <.01           |
| <b>Mechanisms of Injury</b> |         |          |                |
| Transportation accident     | 39      | -        | -              |
| Falls                       | 34      | -        | -              |
| Other                       | 27      | -        | -              |

mTBI: mild traumatic brain injury; NS:  $P > .05$ ; GCS: Glasgow Coma Scale; BAI: Beck Anxiety Inventory; BDI: Beck Depression Inventory-II; ESS: Epworth Sleepiness Scale; PSQI: Pittsburgh Sleep Quality Index

**Table 3.** Differences between control participants and mTBI patients at baseline and 6 weeks post-injury

|                                         | BAI   | BDI   | ESS  | PSQI  |
|-----------------------------------------|-------|-------|------|-------|
| mTBI Baseline vs Control                | 8.02* | 4.08* | 1.33 | 3.81* |
| mTBI 6 wk vs Control                    | 4.51* | 2.27* | 0.87 | 0.7   |
| mTBI Baseline vs mTBI 6 wk <sup>+</sup> | 3.51* | 1.81* | 0.46 | 3.11* |

mTBI: mild traumatic brain injury; BAI: Beck Anxiety Inventory; BDI: Beck Depression Inventory-II; ESS: Epworth Sleepiness Scale; PSQI: Pittsburgh Sleep Quality Index

\* $P < .05$

<sup>+</sup>paired  $t$  test

**Table 4.** Generalized linear regression coefficient estimates of four measurements in controls and mTBI patients at baseline and 6 weeks post-injury

|       | Control vs mTBI (baseline) |        |         |        | Control vs mTBI (6-week) |        |         |        |
|-------|----------------------------|--------|---------|--------|--------------------------|--------|---------|--------|
|       | BAI                        | BDI    | ESS     | PSQI   | BAI                      | BDI    | ESS     | PSQI   |
| mTBI  | 1.4*                       | 0.567* | 0.245*  | 0.487* | 1.026*                   | 2.632* | 1.309*  | 0.557  |
| Age   | 0.0007                     | -0.003 | -0.007* | 0.003  | -0.001                   | -0.035 | -0.045* | 0.016  |
| Women | 0.437*                     | 0.056* | 0.137*  | 0.137* | 0.562*                   | 2.945* | 1.263*  | 1.170* |

mTBI: mild traumatic brain injury; BAI: Beck Anxiety Inventory; BDI: Beck Depression Inventory-II; ESS: Epworth Sleepiness Scale; PSQI: Pittsburgh Sleep Quality Index

\* $P < .05$



### Figure legend

Figure 1. Box plot of the baseline and 6-wk post-injury assessments of the clinical outcomes. White bars represent the data for the control group. Light gray and dark gray bars represent the mild traumatic brain injury (mTBI) patients at baseline and 6 weeks post-injury, respectively. From left to right, the data for the Beck Anxiety Inventory (BAI), the Beck Depression Inventory-II (BDI), the Epworth Sleepiness Scale (ESS), and the Pittsburgh Sleep Quality Index (PSQI) scores are represented.

### Contributorship statement

The six authors are justifiably credited with authorship, according to the authorship criteria. In detail: Hon-Ping Ma – conception, design and interpretation of data, drafting of the manuscript, final approval given; Ju-Chi Ou – analysis and interpretation of data, drafting of the manuscript, final approval given; Chun-Ting Yeh – acquisition of data, final approval given; Dean Wu – final approval given; Shin-Han Tsai – final approval given; Wen-Ta Chiu – Conception, design, final approval given; Chaur-Jong Hu – Conception, design, analysis and interpretation of data, drafting of the manuscript, final approval given.

### Acknowledgments

This study was supported by grants from the National Science Council, Taiwan (NSC 98-2321-B-038-005-MY3, NSC 101-2321-B-038-005, DOH 101-TD-B-111-003).

### Data sharing

No additional data available.

### Conflict of interest

None declared.



## References

- 1 Access Economics Pty Limited. The Economic Cost of Spinal Cord Injury and Traumatic Brain injury in Australia. Geelong, Victoria, Australia: Victorian Neurotrauma Initiative; 2009.
- 2 U.S. Department of Veterans Affairs. VA/DoD clinical practice guideline for management of concussion/mild traumatic brain injury. Washington, DC: U.S. Department of Defense; April 2009.  
[http://www.healthquality.va.gov/mtbi/concussion\\_mtbi\\_full\\_1\\_0.pdf](http://www.healthquality.va.gov/mtbi/concussion_mtbi_full_1_0.pdf). Assessed June, 18, 2013
- 3 McCrea M, Iverson GL, McAllister TW, et al. An integrated review of recovery after mild traumatic brain injury(MTBI): implications for clinical management. *Clin Neuropsychol*. 2009;**23**:1368-90
- 4 Bryant RA, O'Donnell M, Creamer M, et al. The psychiatric sequelae of traumatic injury. *Am J Psychiatry* 2010 ;**167** :312-320
- 5 O'Donnell ML, Creamer M, Bryant RA, et al. Posttraumatic disorders following injury: an empirical and methodological review. *Clin Psychol Rev* 2003;**23**:587-603
- 6 Orff H, Ayalon L, Drummond S. Traumatic brain injury and sleep disturbance: a review of current research. *J Head Trauma Rehabil* 2009;**24**:155-65
- 7 Beck AT, Epstein N, Brown G, et al. An inventory for measuring clinical anxiety: Psychometric properties. *J*

- 1  
2  
3  
4 Consult Clin Psychol 1988; **56**:893-7  
5  
6  
7 8 Beck AT, Steer RA, Brown GK. Manual for the Beck Depression Inventory-II. San Antonio, TX:  
8  
9 Psychological Corporation; 1996  
10  
11  
12 9 John MW. A new method for measuring daytime sleepiness: the Epworth Sleepiness Scale. Sleep 1991;  
13  
14 **14**:540-5  
15  
16  
17  
18 10 Buysse DJ, Reynolds CF, Monk TH, et al. The Pittsburgh Sleep Quality index: a new instrument for  
19  
20 psychiatric practice and research. Psychiatry Research. 1989;**28**:193-213  
21  
22  
23  
24 11 Zheng YP, Wei LA, Goa LG, et al. Applicability of the Chinese Beck Depression Inventory. Compr  
25  
26 Psychiatry. 1988;**29**:484-9  
27  
28  
29  
30 12 Chen NH, Johns MW, Li HY, et al. Validatio of a Chinese version of the Epworth Sleepiness Scale. Qual life  
31  
32 Res. 2002;**11**:817-21  
33  
34  
35  
36 13 Tsai PS, Wang SY, Wang MY, et al. Psychometric evaluation of the Chinese version of the Pittsburgh Sleep  
37  
38 Quality index in primary insomnia and control subjects. Qual Life Res. 2005 **14**; 1943-52  
39  
40  
41  
42 14 Ruff R. Two decades of advances in understanding of mild traumatic brain injury. J Head Trauma Rehabil  
43  
44 2005; **20**:5-18  
45  
46  
47  
48 15 Wood RL. Understanding the 'miserable minority': A diathesis-stress paradigm for postconcussional  
49  
50 syndrome. Brain Injury 2004;**18**:1135-1153  
51  
52  
53  
54 16 Bazarian J, McClung J, Shah M, et al. Mild traumatic brain injury in the US 1998-2000. Brain Injury  
55  
56 2005;**19**:85-91  
57  
58  
59  
60

- 1  
2  
3  
4 17 Baglioni C, Battagliese G, Feige B, et al. Insomnia as a predictor of depression: a meta-analytic evaluation of  
5  
6  
7 longitudinal epidemiological studies. *J Affect Disord* 2011;**135**:10-19  
8  
9  
10 18 Rutherford WH, Merrett JD, McDonald JR. Symptoms at one year following concussion from minor head  
11  
12 injuries. *Injury* 1977; **1**:1-4  
13  
14  
15 19 Beetar JT, Guilmette TJ, Sparadeo FR. Sleep and pain complaints in symptomatic traumatic brain injury and  
16  
17 neurologic populations. *Archives of Physical Medicine and Rehabilitation* 1996;**77**:1298-1302  
18  
19  
20 20 Bryan CJ. Repetitive Traumatic Brain injury (or Concussion) Increases Severity of Sleep Disturbance among  
21  
22 Deployed Military Personnel. *Sleep* 2013;**1**;**36**:941-6  
23  
24  
25  
26 21 Palagini L, Biber K, Riemann D. The genetics of insomnia – evidence for epigenetic mechanisms? *Sleep*  
27  
28  
29  
30  
31  
32  
33 22 Breslau N, Roth T, Rosenthal L, Andreski P. Sleep disturbance and psychiatric disorders: a longitudinal  
34  
35  
36 epidemiological study of young adults. *Biol Psychiatry* 1996;**30**:411-8  
37  
38  
39 23 Ponsford J, Cameron P, Fitzgerald M, et al. Long-term outcomes after uncomplicated mild traumatic brain  
40  
41  
42 injury: a comparison with trauma controls. *J Neurotrauma* 2011;**28**:937-46  
43  
44  
45 24 Hoge CW, McGurk D, Thomas, et al. Mild traumatic brain injury in U.S. Soldiers returning from Iraq. *N*  
46  
47  
48  
49  
50  
51  
52  
53  
54  
55  
56 26 Shalev AY, Freedman S, Peri T, et al. Prospective study of posttraumatic stress disorder and depression  
57  
58  
59  
60

1  
2  
3  
4 following trauma. Am J Psychiatry 1998;**155**:630-7  
5

6  
7 27 McFarlane AC, Papay P, Multiple diagnoses in posttraumatic stress disorder in the victims of a natural  
8

9  
10 disaster. J Nerv Ment Dis 1992;**180**:498-504  
11

12 28 Gosselin N, Lassonde M, Petit D, et al. Sleep following sport-related concussions. Sleep Med 2009;**10** :35-46

13 29 Shekleton JA, Parcell DL, Redman JR, et al. Sleep disturbance and melatonin levels following traumatic  
14 brain injury. Neurology 2010;**74**: 1732-8  
15  
16  
17  
18  
19  
20  
21  
22  
23  
24  
25  
26  
27  
28  
29  
30  
31  
32  
33  
34  
35  
36  
37  
38  
39  
40  
41  
42  
43  
44  
45  
46  
47  
48  
49  
50  
51  
52  
53  
54  
55  
56  
57  
58  
59  
60

1  
2  
3 **Recovery from Sleep Disturbance Precedes that of Depression and Anxiety**  
4 **Following Mild Traumatic Brain Injury: A Six-Week Follow-up Study**  
5  
6

7 Hon-Ping Ma<sup>1,2</sup>; Ju-Chi Ou<sup>1</sup>; Chun-Ting Yeh<sup>1,2</sup>; Dean Wu<sup>3</sup>; Shin-Han Tsai<sup>1,2,4</sup>; Wen-Ta  
8 Chiu<sup>5</sup>; Chaur-Jong Hu<sup>3,6,7</sup>  
9  
10

11 <sup>1</sup> Department of Emergency medicine, Shuang Ho Hospital, Taipei Medical University, New  
12 Taipei City, Taiwan

13 <sup>2</sup> Department of Emergency medicine, School of Medicine, Taipei Medical University, Taipei,  
14 Taiwan

15 <sup>3</sup> Department of Neurology and Sleep Center, Shuang Ho Hospital, Taipei Medical University,  
16 New Taipei City, Taiwan

17 <sup>4</sup> Graduate Institute of Injury Prevention and Control, College of Public Health and Nutrition,  
18 Taipei Medical University, Taipei, Taiwan

19 <sup>5</sup> Ministry of Health and Welfare, Taiwan, ROC

20 <sup>6</sup> Department of Neurology, School of Medicine, Taipei Medical University, Taipei, Taiwan

21 <sup>7</sup> Department of Neurology, National Defense medical center, Taipei, Taiwan  
22  
23  
24  
25  
26  
27  
28  
29  
30  
31

\*Corresponding author: Chaur-Jong Hu

291, Zhongzheng Rd, Zhonghe District, New Taipei City, 23561, Taiwan

Email: [chaurjongh@s.tmu.edu.tw](mailto:chaurjongh@s.tmu.edu.tw) ; phone: 886-2-2249-0088  
32  
33  
34  
35  
36  
37  
38  
39  
40  
41

42 Keywords: mild traumatic brain injury, depression, sleep problem, anxiety  
43  
44

45 Word count: 2283

46 Number of reference: 29  
47  
48  
49  
50  
51  
52  
53  
54  
55  
56  
57  
58  
59  
60

## ABSTRACT

**Introduction:** Previous studies of recovery after mild traumatic brain injury (mTBI) have focused on chronic mental disorders. The detailed course of these disorders at the acute and subacute stages, especially with regard to recovery from sleep disturbances, has not been well characterized. The aim of our study was to determine the course of mental disorders, including depression, anxiety, and sleep disturbance, following mTBI.

**Methods:** We recruited 250 mTBI patients and 100 healthy participants (control group) for our observational study between January 2011 to July 2012. The mTBI and control participants were assessed at baseline and 6 weeks after mTBI using the Beck Anxiety Inventory (BAI), the Beck Depression Inventory II (BDI), the Epworth Sleepiness Scale (ESS), and the Pittsburgh Sleep Quality Index (PSQI).

**Results:** The ESS scores were not significantly different between the 2 groups at baseline or at 6 weeks after mTBI. Although the BAI, BDI, and PSQI scores of the mTBI group were significantly different than those of the control group at baseline, all had improved significantly 6 weeks later. However, only the PSQI score improved to a level that was not significantly different from that of the control group.

**Conclusions:** Daytime sleepiness is not affected by mTBI. However, mTBI causes depression and anxiety and diminished sleep quality. Although all these conditions improve significantly within 6 weeks post-mTBI, only sleep quality improves to a pre-mTBI level. Thus, recovery from mTBI-induced sleep disturbance occurs more rapidly than that of mTBI-induced depression and anxiety.

### Article summary

- 100 mTBI patients and the 137 control participants who completed the questionnaires.
- The number of women is more than the number of men that jointed our study
- Sleep disturbance, depression, anxiety improved after 6 weeks post-injury.
- Recovery from sleep disturbance occurred more rapidly

### Strengths and limitations of this study

Previous reports of the incidence of insomnia among post-acute TBI patients have ranged from 2% to 56%. In our study, 90% of the mTBI patients and 44% of the control participants reported sleep disturbances. Our data showed that recovery from sleep disturbance occurred more rapidly among the mTBI patients than did recovery from post-injury depression and anxiety. Previous studies have demonstrated significant changes in anxiety- and depression-related symptoms between 1 week and 3 months following mTBI. We observed improvement in the depression and anxiety assessment scores in our mTBI cohort at 6 weeks post-injury. Nonetheless, the BDI and the BAI scores differed significantly between the mTBI and control groups at the 6 week post-injury assessment.

Some of our mTBI patients may have used medications before or after suffering mTBI that may have influenced their assessment scores. It is also possible that some of our mTBI patients may have had unrelated diseases or pre-injury conditions that were not identified before or during their participation in our study. In addition, we investigated only the subacute stages of depression, anxiety, and diminished sleep quality, rather than the chronic stages of these diseases.

## INTRODUCTION

Traumatic brain injury (TBI) and mild traumatic brain injury (mTBI) are major public health problems. Studies in Australia have estimated lifetime costs of over \$2.5 million per TBI survivor [1]. Headache, blurred vision, fatigue, and sleep disturbance are the most common physical symptoms following brain injury [2]. Previous studies have reported that the symptom scores following mTBI were equal to that of control patients within 7 days post-injury [3].

However, increasing evidence suggests that the risk of developing a psychiatric disorder increases following mTBI [4]. Although multiple studies have investigated post-traumatic stress disorder (PTSD), the risk of other disorders, such as depression, have also been found to increase following mTBI [5]. The most common psychiatric disorders during the first 12 months following injury are depression, anxiety disorder, and agoraphobia [4].

Diminished sleep quality is one of the most commonly reported symptoms following mTBI [6], and depression and anxiety are also prevalent. However, these conditions are often under-reported, and may become chronic in the absence of treatment. The objectives of our study were to characterize the course of post-mTBI depression, anxiety, and diminished sleep quality during a 6-week follow up, and to compare the baseline and 6-week clinical assessments of mTBI patients with those of healthy participants.

## METHODS

### Participants and Study Design

Our prospective study was approved by the Joint Institutional Review Board of Taipei Medical University. Eligible patients aged  $\geq 20$  years who were treated in an emergency room within 24 hours after closed head trauma were recruited from 3 hospitals in Taiwan between January 2011 and July 2012. The definition of mTBI was based on the diagnostic criteria established by the American Congress of Rehabilitation Medicine, which consist of a Glasgow Coma Scale (GCS) score of 13 to 15 at presentation and loss of consciousness for  $< 30$  min. Patients with a history of cerebrovascular disease, mental retardation, previous TBI, epilepsy, or severe systemic medical illness were excluded from our study. The inclusion of the healthy control participants were no brain injury history and older than 20 years old.

Patients were initially contacted by phone. A total of 607 mTBI patients were recruited for our study, among whom 250 (41.19%) provided informed consent, and completed a baseline assessment during an initial evaluation within 1 month after experiencing an mTBI. Six weeks after completing the baseline assessment, 100 (40%) of the mTBI patients completed the final assessment. The baseline and 6-week assessments consisted of 4 investigator-administered questionnaires, namely, the Beck Anxiety Inventory (BAI) [7], the Beck Depression Inventory-II (BDI) [8], the Epworth Sleepiness Scale (ESS) [9], and the Pittsburgh Sleep Quality Index (PSQI) [10].



## Outcome Measures

The patients' demographic information, injury-related data, and smoking and drinking history were recorded at the baseline evaluation. Chinese versions of the BDI, the BAI, the ESS, and the PSQI were used in our study [11-13]. Depression was assessed using the BDI, which scored the patient's selection of 1 of 4 possible responses to 21 multiple-choice items on a scale of 0 to 3 based on their response. The severity of anxiety symptoms was assessed using the BAI, which also scored the patient's selection of 1 of 4 possible responses to 21 multiple-choice items on a scale of 0 to 3 based on their response. A high score on the BAI indicates a high level of anxiety. Daytime sleepiness was subjectively assessed using the ESS, which asked the patient to rate their risk of falling asleep on a 4-point Likert scale (0-3) in 8 different situations. Overall sleep quality was assessed using the PSQI, which evaluated 7 aspects of sleep quality. A high overall score on the PSQI indicates poor sleep quality.

## Statistical methods

Associations between the categorical variables were evaluated using a chi-squared analysis, and the Fisher exact test was used when at least one of the values was  $<5$ . Associations between the normally distributed continuous variables were evaluated using  $t$  tests, and the Mann-Whitney U test was used to evaluate the continuous variables with an asymmetrical distribution. Paired  $t$  tests and a paired Mann-Whitney U test were used to evaluate the intragroup differences between the baseline and 6-week assessments for normally and asymmetrically distributed data, respectively. In this study, all outcome were abnormally distributed thus the non-parametric method was used. In addition, Generalized linear regression analyses were conducted for outcomes with or without adjustment for age and sex. All the statistical analyses were performed using the R statistical software, version 3.0.1 for Windows (R Foundation for Statistical Computing, Vienna, Austria). The level of statistical significance was set at  $P < .05$ .

## RESULTS

The demographic information and clinical data of all the mTBI and control participants who were initially enrolled in the study are shown in Table 1. Six weeks following their baseline assessment, 150 patients could not be contacted, or declined to participate further in our study. The age; sex; education level; smoking status; alcohol use; proportion reporting depression; mechanism of injury; and GCS, BDI, ESS scores of patients who completed the study did not differ significantly from those of patients who did not complete the study. The patients who did not complete the study had lower mean scores for the BAI and the PSQI than the patients who completed the study.

The demographic information and clinical data of the 100 mTBI patients and the 137 control

1  
2  
3 participants who completed the study are shown in Table 2. The mean age of the mTBI group  
4 was significantly higher than the mean age of the control group. The proportions reporting  
5 alcohol use, headache, and depression were significantly different between the mTBI and  
6 control groups. The percentages of mTBI patients who reported headache or depression were  
7 higher than those of the control group. Transportation accidents and falls caused 39% and  
8 34% of the mTBI cases, respectively. Considering the clinical cut-off for each questionnaire,  
9 most control patients did not have depression, anxiety, daytime sleepiness, or diminished  
10 sleep quality, whereas most of mTBI patients had high PSQI scores.

11  
12 The mean scores of the 4 outcome measures are shown in Figure 1. The average scores  
13 for the mTBI patients at baseline were the highest. After 6 weeks, the average scores for the  
14 mTBI patients decreased. The differences between the outcomes of the mTBI and control  
15 groups are shown in Table 3. The average baseline and 6-week BAI scores for mTBI group  
16 were 10.74 and 7.23, respectively. The BAI scores of the patients in the mTBI group  
17 significantly improved at 6 weeks post-injury. However, the mean BAI scores for the mTBI  
18 group for both the baseline and 6 week assessments were significantly different from those of  
19 the control group at the baseline assessment. The mean BDI scores of the mTBI group were  
20 9.8 and 7.99 at the baseline and 6-week assessments, respectively. The mean BDI score for  
21 mTBI group significantly decreased to the value of 1.81 at 6 weeks post-injury. The mean  
22 BDI score of the control group was 5.72. The mean BDI scores of the mTBI group were  
23 significantly different from those of the control group.

24  
25 No significant difference was observed between the baseline and 6-week ESS scores for  
26 the mTBI group. The mean daytime sleepiness score for the control group was 6.62, which  
27 was not significantly different from that of the mTBI group. The mean baseline PSQI score  
28 for the mTBI group was greater than 9, which was higher than the clinical cut-off point of 5.  
29 In addition, the mean PSQI score of mTBI at baseline assessment was higher than the mean  
30 score of 5.7 for the control group. The mean 6-week PSQI score for the mTBI group  
31 improved significantly to 6.4. The sleep quality of the mTBI group at 6 weeks post-injury  
32 was not significantly different from that of the control group. Because of the significant  
33 difference in mean age between the mTBI and control groups and the predominance of  
34 women in both groups, we performed generalized linear regression analysis of the outcome  
35 measures with adjusting for age and sex (Table 4). The differences in depression, anxiety,  
36 and sleep quality between the mTBI and control patients kept significance after adjusting for  
37 age or sex. However, sex was found to be a significant predictor of sleep quality, anxiety, and  
38 depression in the baseline and 6-week assessments. After adjusting for age and sex, the ESS  
39 score was significantly different between the control and mTBI groups at the baseline and  
40 6-week assessments, and age was determined to be a significant predictor of daytime  
41 sleepiness. In addition, the scores for all 4 outcome measures were higher among women than  
42 among men.

## DISCUSSION

Previous studies have shown that 85% of mTBI patients demonstrate improvement in psychiatric-related symptoms, whereas the remainder develop chronic psychosocial problems [14-16]. Often presenting with anxiety, depression, or sleep disturbances, TBI patients are at an increased risk of developing a psychiatric disorder within 3 months to 1 year post-injury [4]. It is unclear whether post-mTBI sleep disturbances are related to depression or anxiety. Thus, sleep disturbance may be a risk factor of subsequent depression. A meta-analysis of 21 studies demonstrated that insomnia patients have a 2-fold risk of developing depression [17]. The detailed course of post-mTBI depression, anxiety, and diminished sleep quality, especially during the early stages of recovery, have not been well characterized.

We examined the early stages of recovery from mTBI by using self-reported measures of depression, anxiety, sleep quality, and daytime sleepiness. Most of them injured by transportation accident and falls. Other mechanism of injury included hit by something, and sport injury. There was no participant who injured by an industrial accident. We determined that daytime sleepiness is not significantly affected by mTBI. Both the anxiety and depression symptoms in the mTBI group improved by the sixth week of recovery, but remained more severe than those of the control participants. However, sleep quality significantly improved within 6 weeks of experiencing mTBI, returning to a level that did not differ significantly from that of the control group. These results indicate that recovery from diminished sleep quality occurred more rapidly than did recovery from depression and anxiety.

Our prospective cohorts contained more women than men, and the mean ages of the mTBI and control groups differed significantly. Thus, we adjusted our analysis for effects of age and sex. The BAI, BDI, PSQI, and ESS scores were influenced by sex. However, our results demonstrated that the BAI, BDI, and PSQI scores were significantly affected by mTBI, whereas the ESS scores were not. We found the women in the mTBI group reported more severe symptoms for depression, anxiety, and diminished sleep quality at baseline. After 6 weeks of recovery, although the depression- and anxiety-related symptoms of both male and female mTBI patients improved, those of the female mTBI patients remained more severe than those of the male mTBI patients. Female mTBI patients also reported more severe symptoms related to diminished sleep quality and daytime sleepiness than did male mTBI patients.

Previous reports of the incidence of insomnia among post-acute TBI patients have ranged from 2% to 56% [18, 19]. Bryan found that sleep disturbance increases in patients who suffer repetitive TBI [20]. In our study, 90% of the mTBI patients and 44% of the control participants reported sleep disturbances. The average score of PSQI in the control group (5.7) is higher than previously published values (2.7) [10], but it is close to the result of

1  
2  
3 another study in Taiwan also by use of the Chinese PSQI study in healthy group (5.7) [13]. It  
4 may result from the different versions of questionnaire (English and Chinese) or other  
5 uncertain reasons. Our data showed that recovery from sleep disturbance occurred more  
6 rapidly among the mTBI patients than did recovery from post-injury depression and anxiety.  
7 There are 2 possible reasons for this finding. Sleep disturbance may be an independent  
8 symptom of mTBI that alters the circadian rhythm through injury-related changes in gene  
9 expression [21]. Alternatively, sleep disturbance may simply be a symptom of depression or  
10 anxiety that improves early during recovery [22].

11  
12  
13  
14  
15 Previous studies have demonstrated significant changes in anxiety- and  
16 depression-related symptoms between 1 week and 3 months following mTBI [23]. We  
17 observed improvement in the depression and anxiety assessment scores in our mTBI cohort at  
18 6 weeks post-injury. Nonetheless, the BDI and the BAI scores differed significantly between  
19 the mTBI and control groups at the 6 week post-injury assessment.

20  
21  
22 Depression and PTSD have been shown to be critical mediators of the recovery of  
23 physical health following mTBI [24]. Multiple studies have investigated the incidence of  
24 PTSD following TBI [25]. Psychiatric comorbidities have been associated with PTSD  
25 following TBI, and depression was shown to be a predictor of the post-TBI chronicity of  
26 PTSD [26, 27]. We did not explore the role of PTSD in recovery from depression, anxiety,  
27 and diminished sleep quality, but we speculate that PTSD is associated with all of these  
28 mental disorders in mTBI patients.

29  
30  
31  
32 Certain limitations to our findings should be considered. First, some of our mTBI  
33 patients may have used medications before or after suffering mTBI that may have influenced  
34 their assessment scores. Second, it is possible that some of our mTBI patients may have had  
35 unrelated diseases or pre-injury conditions that were not identified before or during their  
36 participation in our study. Third, we investigated only the subacute stages of depression,  
37 anxiety, and diminished sleep quality, rather than the chronic stages of these diseases. In  
38 addition, REM sleep plays an important role in mood disorders. The changes of REM sleep  
39 after mTBI are still controversial[28, 29]. This is certainly a major issue for study. However,  
40 sleep architecture was not measured in our study. Although long-term observational studies  
41 are required to confirm our findings, our results provide valuable information for  
42 understanding the development and recovery of mental disorders following mTBI.  
43  
44  
45  
46  
47  
48  
49  
50  
51  
52  
53  
54  
55  
56  
57  
58  
59  
60

**Table 1.** The demographic and clinical data of all mTBI patients initially enrolled in our study

|                            | Lost to follow up | Completed 6-wk follow up | <i>P</i> value |
|----------------------------|-------------------|--------------------------|----------------|
| Age (y)                    | 38.88             | 39.53                    | NS             |
| Male / Female (n)          | 56/94             | 35/65                    | NS             |
| Education (y)              | 15.04             | 15.46                    | NS             |
| Smoker (N/Y)               | 113 / 37          | 82 / 18                  | NS             |
| Drink alcohol (N/Y)        | 94/56             | 58/ 42                   | NS             |
| Headache (N/Y)             | 50/100            | 25/75                    | .02            |
| Depression (N/Y)           | 91 / 59           | 51 / 49                  | NS             |
| GCS                        | 14.80             | 14.98                    | NS             |
| <b>Mechanism of Injury</b> |                   |                          |                |
| Transportation accident    | 77                | 39                       | NS             |
| Falls                      | 40                | 34                       |                |
| Other                      | 33                | 27                       |                |
| BAI                        | 7.85              | 10.74                    | .03            |
| BDI                        | 8.19              | 9.80                     | NS             |
| ESS                        | 6.89              | 7.95                     | NS             |
| PSQI                       | 6.27              | 9.51                     | <.01           |

mTBI: mild traumatic brain injury; NS:  $P > .05$ ; GCS: Glasgow Coma Scale; BAI: Beck Anxiety Inventory; BDI: Beck Depression Inventory-II; ESS: Epworth Sleepiness Scale; PSQI: Pittsburgh Sleep Quality Index

**Table 2.** The demographic and clinical data of the mTBI patients and the control participants who completed the 6-week follow up

|                             | mTBI    | Control  | <i>P</i> value |
|-----------------------------|---------|----------|----------------|
| Sample size (n)             | 100     | 137      |                |
| Age (y)                     | 39.53   | 29.86    | <.001          |
| Male / Female (n)           | 35/65   | 47/90    | NS             |
| Education (y)               | 15.46   | 14.91    | .045           |
| Smoker (N/Y)                | 82/18   | 115/22   | NS             |
| Drink (N/Y)                 | 58/42   | 51/82    | <.01           |
| Headache (N/Y)              | 25/75   | 98/39    | <.01           |
| Depression (N/Y)            | 51 / 49 | 103/ 34  | <.01           |
| GCS                         | 14.98   | -        | -              |
| <b>Questionnaires</b>       |         |          |                |
| BAI>7 (N/Y)                 | 57 / 43 | 125 / 12 | <.01           |
| BDI>9 (N/Y)                 | 53 / 47 | 111 / 26 | <.01           |
| ESS>9 (N/Y)                 | 66 / 34 | 108 / 29 | <.01           |
| PSQI>5 (N/Y)                | 10 / 90 | 77 / 60  | <.01           |
| <b>Mechanisms of Injury</b> |         |          |                |
| Transportation accident     | 39      | -        | -              |
| Falls                       | 34      | -        | -              |
| Other                       | 27      | -        | -              |

mTBI: mild traumatic brain injury; NS:  $P > .05$ ; GCS: Glasgow Coma Scale; BAI: Beck Anxiety Inventory; BDI: Beck Depression Inventory-II; ESS: Epworth Sleepiness Scale; PSQI: Pittsburgh Sleep Quality Index

**Table 3.** Differences between control participants and mTBI patients at baseline and 6 weeks post-injury

|                                         | BAI   | BDI   | ESS  | PSQI  |
|-----------------------------------------|-------|-------|------|-------|
| mTBI Baseline vs Control                | 8.02* | 4.08* | 1.33 | 3.81* |
| mTBI 6 wk vs Control                    | 4.51* | 2.27* | 0.87 | 0.7   |
| mTBI Baseline vs mTBI 6 wk <sup>+</sup> | 3.51* | 1.81* | 0.46 | 3.11* |

mTBI: mild traumatic brain injury; BAI: Beck Anxiety Inventory; BDI: Beck Depression Inventory-II; ESS: Epworth Sleepiness Scale; PSQI: Pittsburgh Sleep Quality Index

\* $P < .05$

<sup>+</sup>paired  $t$  test

**Table 4.** Generalized linear regression coefficient estimates of four measurements in controls and mTBI patients at baseline and 6 weeks post-injury

|       | Control vs mTBI (baseline) |        |         |        | Control vs mTBI (6-week) |        |         |        |
|-------|----------------------------|--------|---------|--------|--------------------------|--------|---------|--------|
|       | BAI                        | BDI    | ESS     | PSQI   | BAI                      | BDI    | ESS     | PSQI   |
| mTBI  | 1.4*                       | 0.567* | 0.245*  | 0.487* | 1.026*                   | 2.632* | 1.309*  | 0.557  |
| Age   | 0.0007                     | -0.003 | -0.007* | 0.003  | -0.001                   | -0.035 | -0.045* | 0.016  |
| Women | 0.437*                     | 0.056* | 0.137*  | 0.137* | 0.562*                   | 2.945* | 1.263*  | 1.170* |

mTBI: mild traumatic brain injury; BAI: Beck Anxiety Inventory; BDI: Beck Depression Inventory-II; ESS: Epworth Sleepiness Scale; PSQI: Pittsburgh Sleep Quality Index

\* $P < .05$



**Conflict of interest**

None declared.

**Acknowledgments**

This study was supported by grants from the National Science Council, Taiwan (NSC 98-2321-B-038-005-MY3, NSC 101-2321-B-038-005, DOH 101-TD-B-111-003).

**Data sharing**

There is no additional data available.

**Contributorship statement**

The six authors are justifiably credited with authorship, according to the authorship criteria. In detail: Hon-Ping Ma – conception, design and interpretation of data, drafting of the manuscript, final approval given; Ju-Chi Ou – analysis and interpretation of data, drafting of the manuscript, final approval given; Chun-Ting Yeh – acquisition of data, final approval given; Dean Wu – final approval given; Shin-Han Tsai – final approval given; Wen-Ta Chiu – Conception, design, final approval given; Chaur-Jong Hu – Conception, design, analysis and interpretation of data, drafting of the manuscript, final approval given.

**References**

1 Access Economics Pty Limited. The Economic Cost of Spinal Cord Injury and Traumatic Brain injury in



1  
2  
3  
4 Australia. Geelong, Victoria, Australia: Victorian Neurotrauma Initiative; 2009.

5  
6  
7 2 U.S. Department of Veterans Affairs. VA/DoD clinical practice guideline for management of concussion/mild

8  
9  
10 traumatic brain injury. Washington, DC: U.S. Department of Defense; April 2009.

11  
12 [http://www.healthquality.va.gov/mtbi/concussion\\_mtbi\\_full\\_1\\_0.pdf](http://www.healthquality.va.gov/mtbi/concussion_mtbi_full_1_0.pdf). Assessed June, 18, 2013

13  
14  
15 3 McCrea M, Iverson GL, McAllister TW, et al. An integrated review of recovery after mild traumatic brain

16  
17  
18 injury(MTBI): implications for clinical management. Clin Neuropsychol. 2009;**23**:1368-90

19  
20  
21 4 Bryant RA, O'Donnell M, Creamer M, et al. The psychiatric sequelae of traumatic injury. Am J Psychiatry

22  
23  
24 2010 ;**167** :312-320

25  
26  
27 5 O'Donnell ML, Creamer M, Bryant RA, et al. Posttraumatic disorders following injury: an empirical and

28  
29  
30 methodological review. Clin Psychol Rev 2003;**23**:587-603

31  
32  
33 6 Orff H, Ayalon L, Drummond S. Traumatic brain injury and sleep disturbance: a review of current research. J

34  
35  
36 Head Trauma Rehabil 2009;**24**:155-65

37  
38  
39 7 Beck AT, Epstein N, Brown G, et al. An inventory for measuring clinical anxiety: Psychometric properties. J

40  
41  
42 Consult Clin Psychol 1988; **56**:893-7

43  
44  
45 8 Beck AT, Steer RA, Brown GK. Manual for the Beck Depression Inventory-II. San Antonio, TX:

46  
47  
48 Psychological Corporation; 1996

49  
50  
51 9 John MW. A new method for measuring daytime sleepiness: the Epworth Sleepiness Scale. Sleep 1991;

52  
53  
54 **14**:540-5

55  
56  
57 10 Buysse DJ, Reynolds CF, Monk TH, et al. The Pittsburgh Sleep Quality index: a new instrument for

- 1  
2  
3  
4 psychiatric practice and research. *Psychiatry Research*. 1989;**28**:193-213  
5  
6  
7 11 Zheng YP, Wei LA, Goa LG, et al. Applicability of the Chinese Beck Depression Inventory. *Compr*  
8  
9  
10 *Psychiatry*. 1988;**29**:484-9  
11  
12 12 Chen NH, Johns MW, Li HY, et al. Validatio of a Chinese version of the Epworth Sleepiness Scale. *Qual life*  
13  
14  
15 *Res*. 2002;**11**:817-21  
16  
17  
18 13 Tsai PS, Wang SY, Wang MY, et al. Psychometric evaluation of the Chinese version of the Pittsburgh Sleep  
19  
20  
21 *Quality index in primary insomnia and control subjects*. *Qual Life Res*. 2005 **14**; 1943-52  
22  
23  
24 14 Ruff R. Two decades of advances in understanding of mild traumatic brain injury. *J Head Trauma Rehabil*  
25  
26  
27 2005; **20**:5-18  
28  
29  
30 15 Wood RL. Understanding the 'miserable minority': A diathesis-stress paradigm for postconcussional  
31  
32  
33 *syndrome*. *Brain Injury* 2004;**18**:1135-1153  
34  
35  
36 16 Bazarian J, McClung J, Shah M, et al. Mild traumatic brain injury in the US 1998-2000. *Brain Injury*  
37  
38  
39 2005;**19**:85-91  
40  
41  
42 17 Baglioni C, Battagliese G, Feige B, et al. Insomnia as a predictor of depression: a meta-analytic evaluation of  
43  
44  
45 *longitudinal epidemiological studies*. *J Affect Disord* 2011;**135**:10-19  
46  
47  
48 18 Rutherford WH, Merrett JD, McDonald JR. Symptoms at one year following concussion from minor head  
49  
50  
51 *injuries*. *Injury* 1977; **1**:1-4  
52  
53  
54 19 Beetar JT, Guilmette TJ, Sparadeo FR. Sleep and pain complaints in symptomatic traumatic brain injury and  
55  
56  
57 *neurologic populations*. *Archives of Physical Medicine and Rehabilitation* 1996;**77**:1298-1302  
58  
59  
60

- 1  
2  
3  
4 20 Bryan CJ. Repetitive Traumatic Brain injury (or Concussion) Increases Severity of Sleep Disturbance among  
5  
6  
7 Deployed Military Personnel. *Sleep* 2013;1;**36**:941-6  
8  
9  
10 21 Palagini L, Biber K, Riemann D. The genetics of insomnia – evidence for epigenetic mechanisms? *Sleep*  
11  
12  
13 *Med Rev.* 2013;1-11  
14  
15 22 Breslau N, Roth T, Rosenthal L, Andreski P. Sleep disturbance and psychiatric disorders: a longitudinal  
16  
17  
18 epidemiological study of young adults. *Biol Psychiatry* 1996;**30**:411-8  
19  
20  
21 23 Ponsford J, Cameron P, Fitzgerald M, et al. Long-term outcomes after uncomplicated mild traumatic brain  
22  
23  
24 injury: a comparison with trauma controls. *J Neurotrauma* 2011;**28**:937-46  
25  
26  
27 24 Hoge CW, McGurk D, Thomas, et al. Mild traumatic brain injury in U.S. Soldiers returning from Iraq. *N*  
28  
29  
30 *Engl J Med* 2008;**358**:453-63  
31  
32  
33 25 O'Donnell ML, Creamer M, Pattison P, et al. Psychiatric morbidity following injury. *Am J Psychiatry* 2004;  
34  
35  
36 **161**:507-14  
37  
38  
39 26 Shalev AY, Freedman S, Peri T, et al. Prospective study of posttraumatic stress disorder and depression  
40  
41  
42 following trauma. *Am J Psychiatry* 1998;**155**:630-7  
43  
44  
45 27 McFarlane AC, Papay P, Multiple diagnoses in posttraumatic stress disorder in the victims of a natural  
46  
47  
48 disaster. *J Nerv Ment Dis* 1992;**180**:498-504  
49  
50 28 Gosselin N, Lassonde M, Petit D, et al. Sleep following sport-related concussions. *Sleep Med* 2009;**10** :35-46  
51 29 Shekleton JA, Parcell DL, Redman JR, et al. Sleep disturbance and melatonin levels following traumatic  
52 brain injury. *Neurology* 2010;**74**: 1732-8  
53  
54  
55  
56  
57  
58  
59  
60

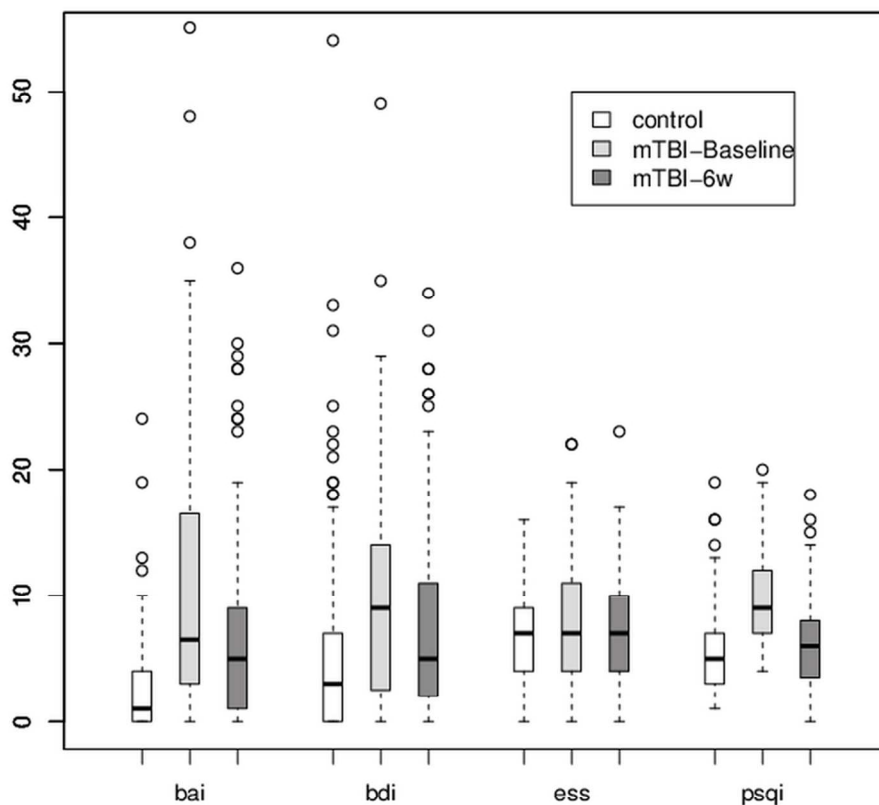

Figure 1. Box plot of the baseline and 6-wk post-injury assessments of the clinical outcomes. White bars represent the data for the control group. Light gray and dark gray bars represent the mild traumatic brain injury (mTBI) patients at baseline and 6 weeks post-injury, respectively. From left to right, the data for the Beck Anxiety Inventory (BAI), the Beck Depression Inventory-II (BDI), the Epworth Sleepiness Scale (ESS), and the Pittsburgh Sleep Quality Index (PSQI) scores are represented.  
90x90mm (300 x 300 DPI)

## STROBE Statement—checklist of items that should be included in reports of observational studies

|                              | Item No | Recommendation                                                                                                                                                                                                                                                                                                                                  |
|------------------------------|---------|-------------------------------------------------------------------------------------------------------------------------------------------------------------------------------------------------------------------------------------------------------------------------------------------------------------------------------------------------|
| <b>Title and abstract</b>    | 1       | (a) Indicate the study's design with a commonly used term in the title or the abstract<br>Page 2 – observational study<br>(b) Provide in the abstract an informative and balanced summary of what was done and what was found<br>Page 2 – results and conclusions                                                                               |
| <b>Introduction</b>          |         |                                                                                                                                                                                                                                                                                                                                                 |
| Background/rationale         | 2       | Explain the scientific background and rationale for the investigation being reported<br>Page 3                                                                                                                                                                                                                                                  |
| Objectives                   | 3       | State specific objectives, including any prespecified hypotheses<br>Page 3                                                                                                                                                                                                                                                                      |
| <b>Methods</b>               |         |                                                                                                                                                                                                                                                                                                                                                 |
| Study design                 | 4       | Present key elements of study design early in the paper<br>Page 3                                                                                                                                                                                                                                                                               |
| Setting                      | 5       | Describe the setting, locations, and relevant dates, including periods of recruitment, exposure, follow-up, and data collection<br>Page 3                                                                                                                                                                                                       |
| Participants                 | 6       | (a) <i>Case-control study</i> —Give the eligibility criteria, and the sources and methods of case ascertainment and control selection. Give the rationale for the choice of cases and controls<br>Page 3<br>(b) <i>Case-control study</i> —For matched studies, give matching criteria and the number of controls per case<br>Not matched study |
| Variables                    | 7       | Clearly define all outcomes, exposures, predictors, potential confounders, and effect modifiers. Give diagnostic criteria, if applicable<br>Page 3 & 4                                                                                                                                                                                          |
| Data sources/<br>measurement | 8*      | For each variable of interest, give sources of data and details of methods of assessment (measurement). Describe comparability of assessment methods if there is more than one group<br>Page 4                                                                                                                                                  |
| Bias                         | 9       | Describe any efforts to address potential sources of bias                                                                                                                                                                                                                                                                                       |
| Study size                   | 10      | Explain how the study size was arrived at                                                                                                                                                                                                                                                                                                       |
| Quantitative variables       | 11      | Explain how quantitative variables were handled in the analyses. If applicable, describe which groupings were chosen and why<br>Page 4                                                                                                                                                                                                          |
| Statistical methods          | 12      | (a) Describe all statistical methods, including those used to control for confounding<br>Page 4<br>(b) Describe any methods used to examine subgroups and interactions<br>(c) Explain how missing data were addressed                                                                                                                           |

|  |  |                                                                                                              |
|--|--|--------------------------------------------------------------------------------------------------------------|
|  |  | (d) <i>Cohort study</i> —If applicable, explain how loss to follow-up was addressed                          |
|  |  | <i>Case-control study</i> —If applicable, explain how matching of cases and controls was addressed           |
|  |  | <i>Cross-sectional study</i> —If applicable, describe analytical methods taking account of sampling strategy |
|  |  | Not applicable                                                                                               |
|  |  | (e) Describe any sensitivity analyses                                                                        |
|  |  | Not applicable                                                                                               |

## Results

|                   |     |                                                                                                                                                                                                                                                                                                                                                                                                                         |
|-------------------|-----|-------------------------------------------------------------------------------------------------------------------------------------------------------------------------------------------------------------------------------------------------------------------------------------------------------------------------------------------------------------------------------------------------------------------------|
| Participants      | 13* | (a) Report numbers of individuals at each stage of study—eg numbers potentially eligible, examined for eligibility, confirmed eligible, included in the study, completing follow-up, and analysed<br>Page 4<br>(b) Give reasons for non-participation at each stage<br>(c) Consider use of a flow diagram                                                                                                               |
| Descriptive data  | 14* | (a) Give characteristics of study participants (eg demographic, clinical, social) and information on exposures and potential confounders<br>Page 4 & 5, table 2<br>(b) Indicate number of participants with missing data for each variable of interest<br>(c) <i>Cohort study</i> —Summarise follow-up time (eg, average and total amount)<br>Not applicable                                                            |
| Outcome data      | 15* | <i>Cohort study</i> —Report numbers of outcome events or summary measures over time<br><i>Case-control study</i> —Report numbers in each exposure category, or summary measures of exposure<br>Page 4 & 5<br><i>Cross-sectional study</i> —Report numbers of outcome events or summary measures                                                                                                                         |
| Main results      | 16  | (a) Give unadjusted estimates and, if applicable, confounder-adjusted estimates and their precision (eg, 95% confidence interval). Make clear which confounders were adjusted for and why they were included<br>Page 5<br>(b) Report category boundaries when continuous variables were categorized<br>(c) If relevant, consider translating estimates of relative risk into absolute risk for a meaningful time period |
| Other analyses    | 17  | Report other analyses done—eg analyses of subgroups and interactions, and sensitivity analyses<br>Not applicable                                                                                                                                                                                                                                                                                                        |
| <b>Discussion</b> |     |                                                                                                                                                                                                                                                                                                                                                                                                                         |
| Key results       | 18  | Summarise key results with reference to study objectives<br>Page 6                                                                                                                                                                                                                                                                                                                                                      |

|    |                          |    |                                                                                                     |
|----|--------------------------|----|-----------------------------------------------------------------------------------------------------|
| 1  |                          |    |                                                                                                     |
| 2  | Limitations              | 19 | Discuss limitations of the study, taking into account sources of potential bias or imprecision.     |
| 3  |                          |    | Discuss both direction and magnitude of any potential bias                                          |
| 4  |                          |    | Page 6                                                                                              |
| 5  | Interpretation           | 20 | Give a cautious overall interpretation of results considering objectives, limitations, multiplicity |
| 6  |                          |    | of analyses, results from similar studies, and other relevant evidence                              |
| 7  |                          |    | Page 6 & 7                                                                                          |
| 8  | Generalisability         | 21 | Discuss the generalisability (external validity) of the study results                               |
| 9  |                          |    | Page 6 & 7                                                                                          |
| 10 |                          |    |                                                                                                     |
| 11 | <b>Other information</b> |    |                                                                                                     |
| 12 | Funding                  | 22 | Give the source of funding and the role of the funders for the present study and, if applicable,    |
| 13 |                          |    | for the original study on which the present article is based                                        |
| 14 |                          |    | Page 11                                                                                             |
| 15 |                          |    |                                                                                                     |
| 16 |                          |    |                                                                                                     |

17  
18 \*Give information separately for cases and controls in case-control studies and, if applicable, for exposed and  
19 unexposed groups in cohort and cross-sectional studies.  
20

21  
22 **Note:** An Explanation and Elaboration article discusses each checklist item and gives methodological background and  
23 published examples of transparent reporting. The STROBE checklist is best used in conjunction with this article (freely  
24 available on the Web sites of PLoS Medicine at <http://www.plosmedicine.org/>, Annals of Internal Medicine at  
25 <http://www.annals.org/>, and Epidemiology at <http://www.epidem.com/>). Information on the STROBE Initiative is  
26 available at [www.strobe-statement.org](http://www.strobe-statement.org).  
27  
28  
29  
30  
31  
32  
33  
34  
35  
36  
37  
38  
39  
40  
41  
42  
43  
44  
45  
46  
47  
48  
49  
50  
51  
52  
53  
54  
55  
56  
57  
58  
59  
60
